# Supplementary material for: Oxytocin receptors influence the development and maintenance of social behavior in zebrafish (Danio rerio)
Source: PubMed Central journal article supplement (PMC8918347; doi:10.1038/s41598-022-07990-y), 2022-03-12
Supplement: 41598_2022_7990_MOESM1_ESM.pdf [file 41598_2022_7990_MOESM1_ESM.pdf]

**Oxytocin receptors influence the development and maintenance of social behavior in zebrafish (*Danio rerio*).**

Anja Gemmer<sup>1</sup>, Kristina Mirkes<sup>1</sup>, Lukas Anneser<sup>1</sup>, Tim Eilers<sup>1</sup>, Caroline Kibat<sup>2,3</sup>, Ajay Mathuru<sup>2,3,4</sup>, Soojin Ryu<sup>5</sup>, Erin Schuman<sup>1\*</sup>

- 1: Max Planck Institute for Brain Research, Germany
- 2: Department of Physiology, YLL School of Medicine, National University of Singapore, Singapore
- 3: Yale-NUS College, 12 College Avenue West, Singapore
- 4: Institute of Molecular and Cell Biology, A\*STAR, Singapore
- 5: Living Systems Institute & College of Medicine and Health, University of Exeter, UK

**a**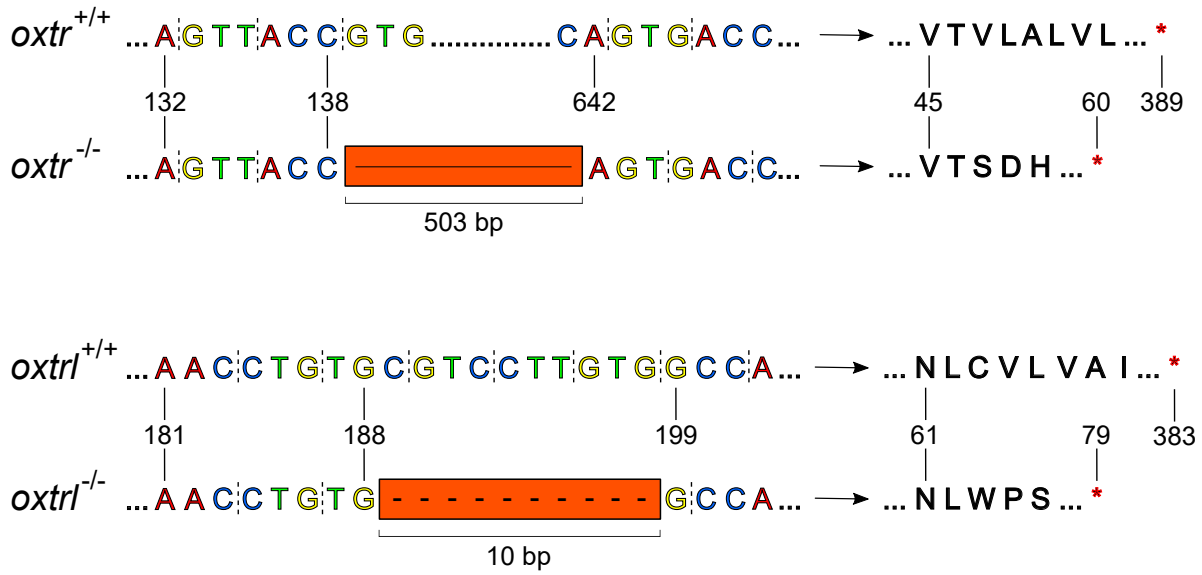**b**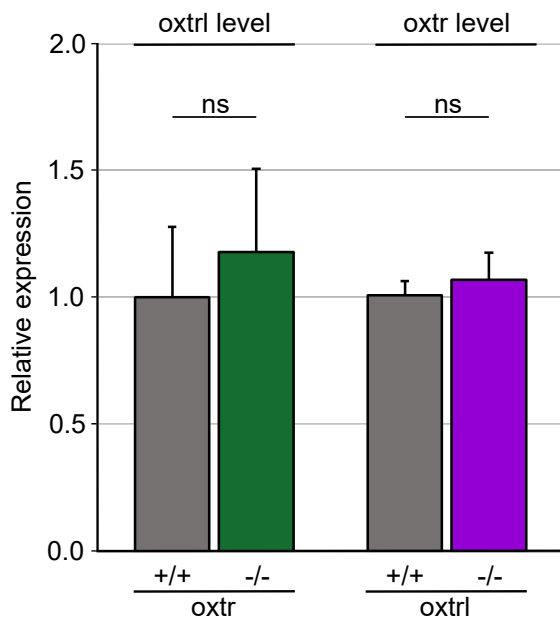**c**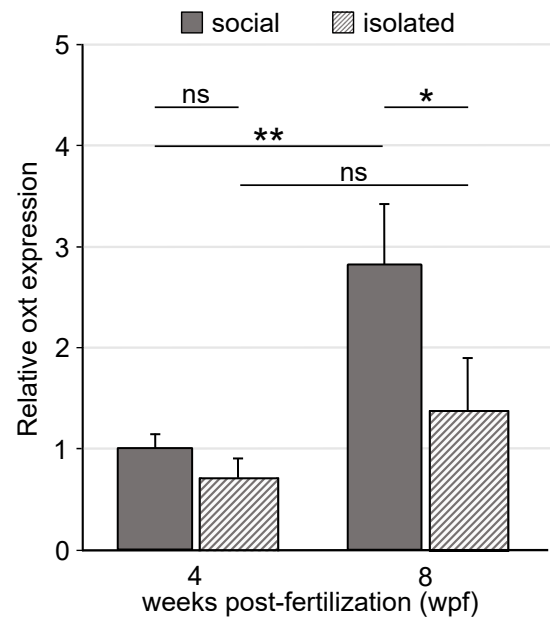**d**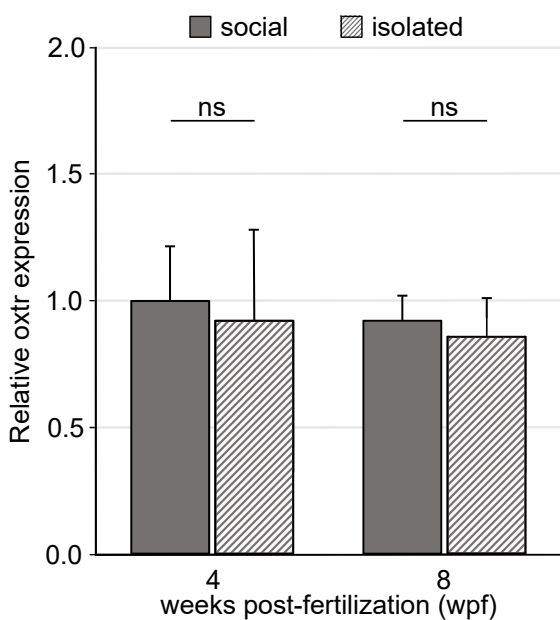**e**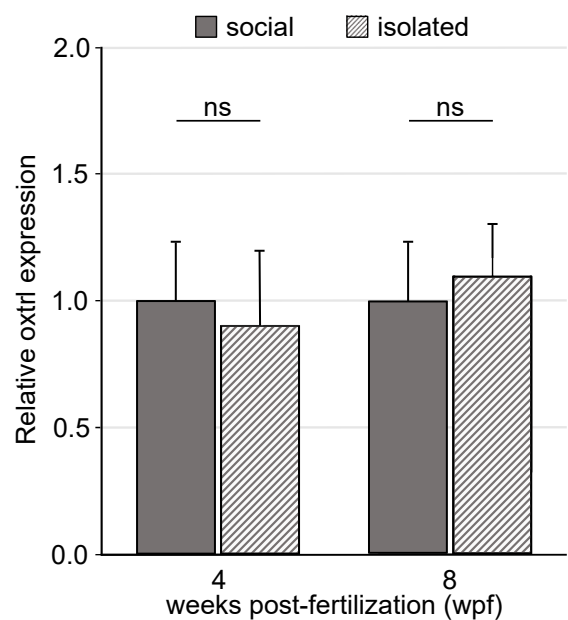

**Supplementary Figure S1: Details of the CRISPR/Cas9 generated KO, potential compensation and effect of isolation on *oxt*, *oxtr* and *oxtrl* transcription.**

**(a)** A 503 base pair deletion in the *oxtr* gene and a 10 base pair deletion in the *oxtrl* gene caused frameshifts leading to premature stop codons. The resulting mutant Oxtr protein size is 59 amino acids (wild-type Oxtr protein is 388 amino acids) and mutant Oxtrl protein size is 78 amino acids (wild-type Oxtrl protein is 382 amino acids). From the different receptor parts (N- and C-terminus, seven transmembrane helices, three intracellular and three extracellular loops) only the N-terminus and parts of the first transmembrane helix were present in mutant Oxtr and Oxtrl, respectively.

**(b)** The knocked-out receptor was not compensated by enhanced expression of the intact cognate receptor (Oxtrl in *oxtr*<sup>-/-</sup>, Oxtr in *oxtrl*<sup>-/-</sup>). Asterisks represent the statistical comparison of relative gene expression between wild-type and mutant genotype.  $n(\text{oxtr}^{+/+}, 8 \text{ wpf}) = 5$ ,  $n(\text{oxtr}^{-/-}, 8 \text{ wpf}) = 6$ ,  $n(\text{oxtrl}^{+/+}, 8 \text{ wpf}) = 6$ ,  $n(\text{oxtrl}^{-/-}, 8 \text{ wpf}) = 4$ . Kruskal-Wallis-Test:  $p(8\text{wpf}) = 8.80 \times 10^{-1}$ , Wilcoxon rank-sum test for wild-type vs. mutant genotype:  $p(\text{oxtr}^{+/+} \leftrightarrow \text{oxtr}^{-/-}) = 9.31 \times 10^{-1}$ ,  $p(\text{oxtrl}^{+/+} \leftrightarrow \text{oxtrl}^{-/-}) = 9.31 \times 10^{-1}$ .

**(c)** Isolation rearing led to significantly decreased *oxt* expression at 8 wpf. Under social conditions, wild-type zebrafish expressed Oxytocin at significantly higher levels with increasing age. This effect is significantly reduced after isolation rearing. Asterisks represent the statistical comparison of rearing condition or age.  $n(\text{social wildtype}, 4\text{wpf}) = 5$ ,  $n(\text{isolated wildtype}, 4\text{wpf}) = 6$ ,  $n(\text{social wildtype}, 8\text{wpf}) = 11$ ,  $n(\text{isolated wildtype}, 8\text{wpf}) = 10$ . Kruskal-Wallis-Test:  $p(\text{wildtype}) = 8.00 \times 10^{-4}$ , Wilcoxon rank-sum test for social vs. isolation rearing:  $p(\text{wildtype}, 4\text{wpf}) = 3.29 \times 10^{-1}$ ,  $p(\text{wildtype}, 8\text{wpf}) = 1.34 \times 10^{-2}$ . Wilcoxon rank-sum test for 4wpf vs. 8wpf:  $p(\text{social wildtype}) = 1.83 \times 10^{-3}$ ,  $p(\text{isolated wildtype}) = 3.29 \times 10^{-1}$ .

**(d)** The expression of *oxtr* was not altered by isolation rearing in both 4- and 8-week old wildtype zebrafish. Asterisks represent the statistical comparison of relative gene expression between wild-type and mutant genotype.  $n(\text{social wildtype}, 4\text{wpf}) = 5$ ,  $n(\text{isolated wildtype}, 4\text{wpf}) = 4$ ,  $n(\text{social wildtype}, 8\text{wpf}) = 7$ ,  $n(\text{isolated wildtype}, 8\text{wpf}) = 8$ . Kruskal-Wallis-Test:  $p(\text{wildtype}) = 9.90 \times 10^{-1}$ , Wilcoxon rank-sum test for social vs. isolation rearing:  $p(\text{wildtype}, 4\text{wpf}) = 9.33 \times 10^{-1}$ ,  $p(\text{wildtype}, 8\text{wpf}) = 9.33 \times 10^{-1}$ .

**(e)** Similarly, the expression of *oxtrl* remained unaffected by isolation rearing at 4 and 8 wpf. Asterisks represent the statistical comparison of relative gene expression between wild-type and mutant genotype.  $n(\text{social wildtype}, 4\text{wpf}) = 5$ ,  $n(\text{isolated wildtype}, 4\text{wpf}) = 4$ ,  $n(\text{social wildtype}, 8\text{wpf}) = 7$ ,  $n(\text{isolated wildtype}, 8\text{wpf}) = 8$ . Kruskal-Wallis-Test:  $p(\text{wildtype}) = 9.91 \times 10^{-1}$ , Wilcoxon rank-sum test for social vs. isolation rearing:  $p(\text{wildtype}, 4\text{wpf}) = 9.05 \times 10^{-1}$ ,  $p(\text{wildtype}, 8\text{wpf}) = 9.05 \times 10^{-1}$ .

Number of replicates (n) and excluded n can be found in Supplementary Table S1, significance values in Supplementary Table S2. Significance is reported as \* $p < 0.05$ , \*\* $p < 0.01$ , \*\*\* $p < 0.001$ .

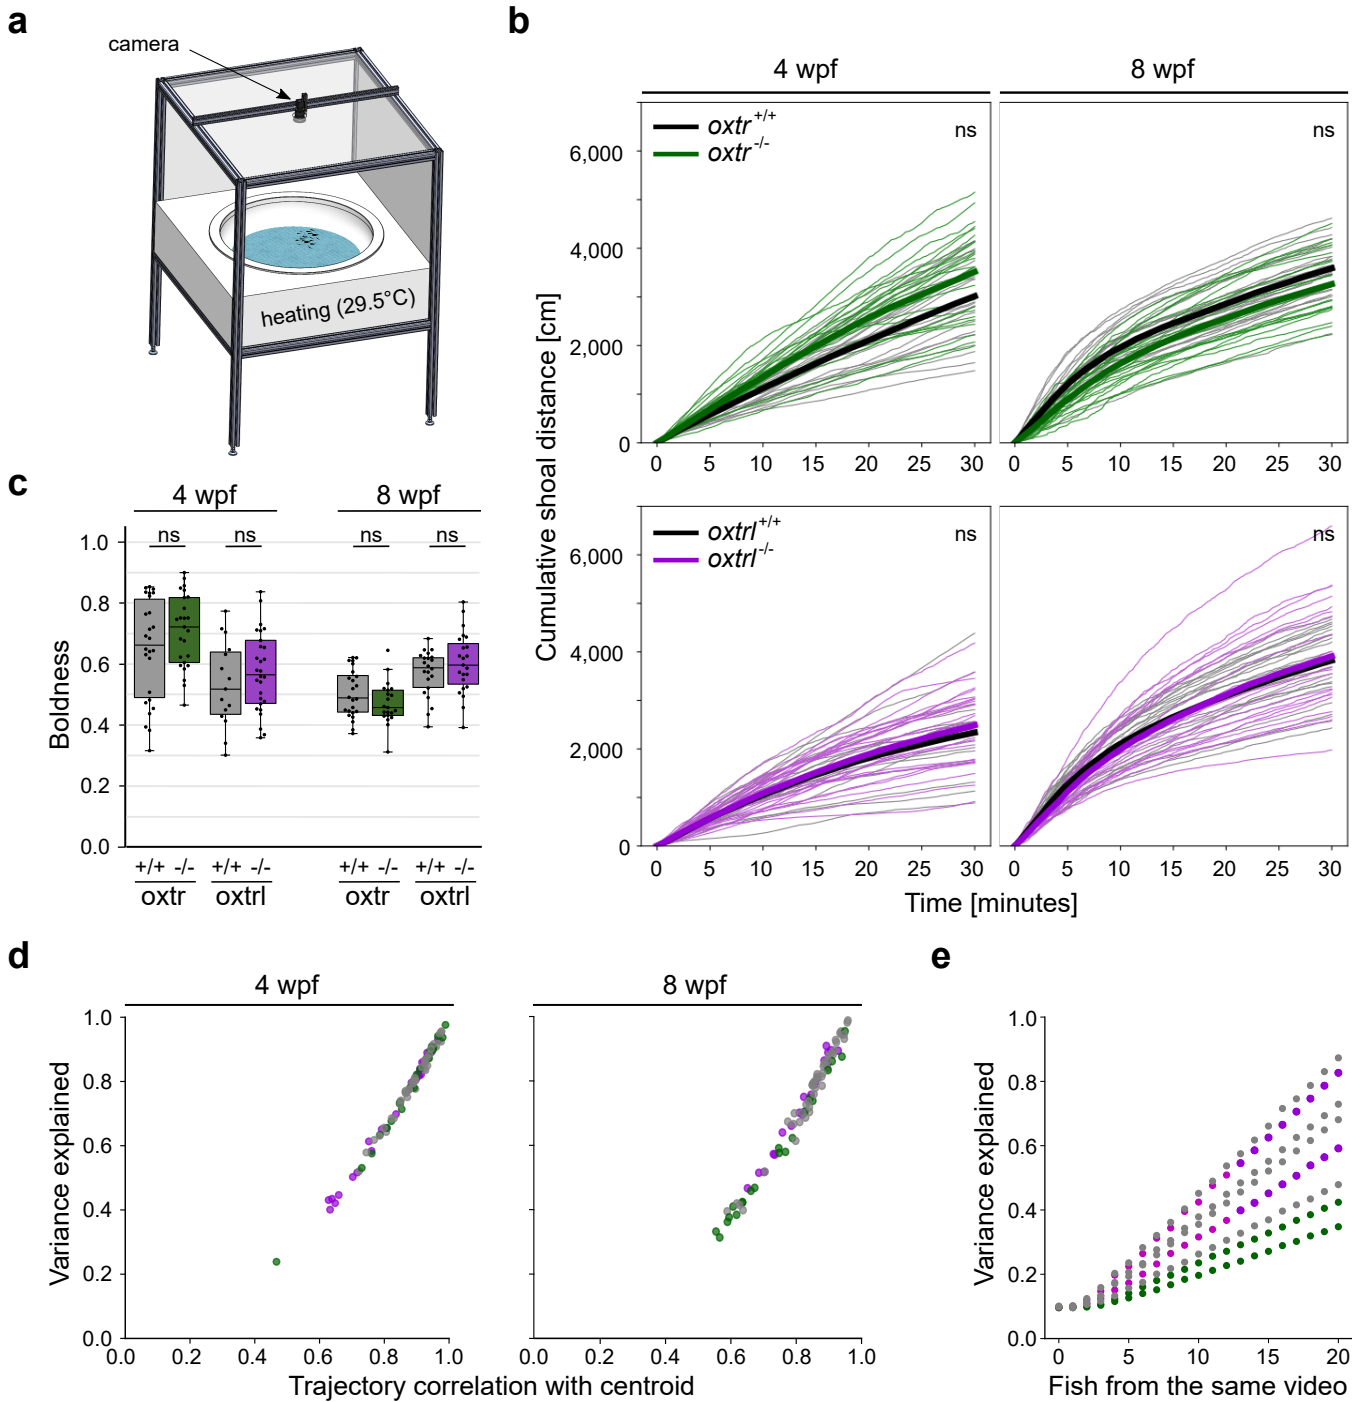

## Supplementary Figure S2: Shoaling setup details, cumulative shoal distance, boldness and variance explained as polarization parameter.

**(a)** The behavioral chamber for the shoaling experiments was composed of a round tank, surrounded by 29.5°C warm water. White LEDs in the ceiling provided illumination for the camera positioned above.

**(b)** Knocking-out one of the Oxytocin receptors did not lead to significant changes in the cumulative shoal distance at both 4 and 8 wpf. Number of shoals (containing 20 fish each) per group:  $n(\text{oxtr}^{+/+}, 4\text{wpf}) = 26$ ,  $n(\text{oxtr}^{-/-}, 4\text{wpf}) = 25$ ,  $n(\text{oxtrl}^{+/+}, 4\text{wpf}) = 15$ ,  $n(\text{oxtrl}^{-/-}, 4\text{wpf}) = 28$ ,  $n(\text{oxtr}^{+/+}, 8\text{wpf}) = 24$ ,  $n(\text{oxtr}^{-/-}, 8\text{wpf}) = 21$ ,  $n(\text{oxtrl}^{+/+}, 8\text{wpf}) = 22$ ,  $n(\text{oxtrl}^{-/-}, 8\text{wpf}) = 23$ . Kruskal-Wallis-Test for cumulative shoal distance:  $p(4\text{wpf}) = 2.00 \times 10^{-4}$ ,  $p(8\text{wpf}) = 5.25 \times 10^{-2}$ , Wilcoxon rank-sum test for the cumulative shoal distance of wild-type vs. mutant genotype:  $p(\text{oxtr}^{+/+} \leftrightarrow \text{oxtr}^{-/-}, 4\text{wpf}) = 8.01 \times 10^{-2}$ ,  $p(\text{oxtrl}^{+/+} \leftrightarrow \text{oxtrl}^{-/-}, 4\text{wpf}) = 4.52 \times 10^{-1}$ ,  $p(\text{oxtr}^{+/+} \leftrightarrow \text{oxtr}^{-/-}, 8\text{wpf}) = 1.82 \times 10^{-1}$ ,  $p(\text{oxtrl}^{+/+} \leftrightarrow \text{oxtrl}^{-/-}, 8\text{wpf}) = 9.37 \times 10^{-1}$ .

**(c)** Boldness, the willingness of a fish to enter open water, was not altered in either *oxtr*<sup>-/-</sup> or *oxtrl*<sup>-/-</sup>. Each dot represents one shoal. Asterisks represent the statistical comparison between mutant and wild-type genotype at different ages. Number of shoals (containing 20 fish each) per group:  $n(\text{oxtr}^{+/+}, 4\text{wpf}) = 26$ ,  $n(\text{oxtr}^{-/-}, 4\text{wpf}) = 25$ ,  $n(\text{oxtrl}^{+/+}, 4\text{wpf}) = 15$ ,  $n(\text{oxtrl}^{-/-}, 4\text{wpf}) = 28$ ,  $n(\text{oxtr}^{+/+}, 8\text{wpf}) = 24$ ,  $n(\text{oxtr}^{-/-}, 8\text{wpf}) = 21$ ,  $n(\text{oxtrl}^{+/+}, 8\text{wpf}) = 22$ ,  $n(\text{oxtrl}^{-/-}, 8\text{wpf}) = 23$ . Kruskal-Wallis-Test for boldness:  $p(4\text{wpf}) = 1.20 \times 10^{-3}$ ,  $p(8\text{wpf}) = 8.54 \times 10^{-6}$ , Wilcoxon rank-sum test for the boldness of wild-type vs. mutant genotype:  $p(\text{oxtr}^{+/+} \leftrightarrow \text{oxtr}^{-/-}, 4\text{wpf}) = 3.66 \times 10^{-1}$ ,  $p(\text{oxtrl}^{+/+} \leftrightarrow \text{oxtrl}^{-/-}, 4\text{wpf}) = 3.66 \times 10^{-1}$ ,  $p(\text{oxtr}^{+/+} \leftrightarrow \text{oxtr}^{-/-}, 8\text{wpf}) = 2.71 \times 10^{-1}$ ,  $p(\text{oxtrl}^{+/+} \leftrightarrow \text{oxtrl}^{-/-}, 8\text{wpf}) = 2.71 \times 10^{-1}$ .

**(d)** The variance explained correlates with the trajectory correlation with centroid, making the variance explained a useful polarization parameter.

**(e)** Adding more fish of the same video, while maintaining a group size of 20 with trajectories chosen from random videos, increased the variance explained – indicating its suitability as polarization parameter. Shown are two exemplar replicates per genotype group, color-coded in grey (*oxtr*<sup>+/+</sup> and *oxtrl*<sup>+/+</sup>), green (*oxtr*<sup>-/-</sup>) and purple (*oxtrl*<sup>-/-</sup>).

Number of replicates (n) and excluded n can be found in Supplementary Table S1, significance values in Supplementary Table S2. Significance is reported as \* $p < 0.05$ , \*\* $p < 0.01$ , \*\*\* $p < 0.001$ .

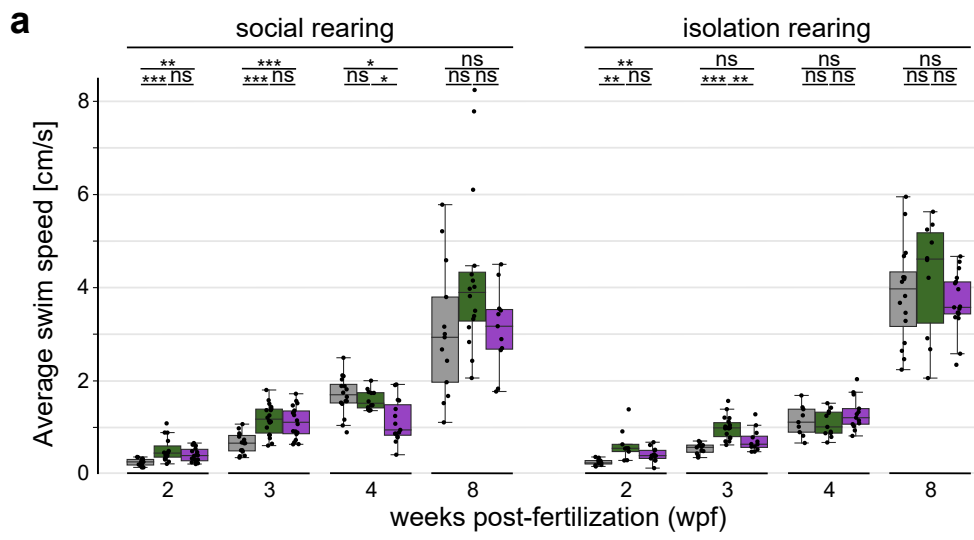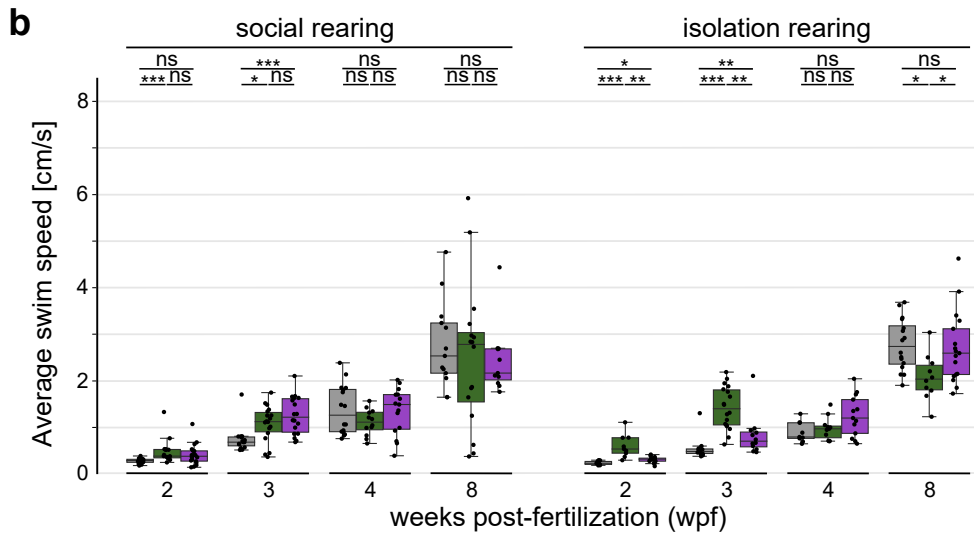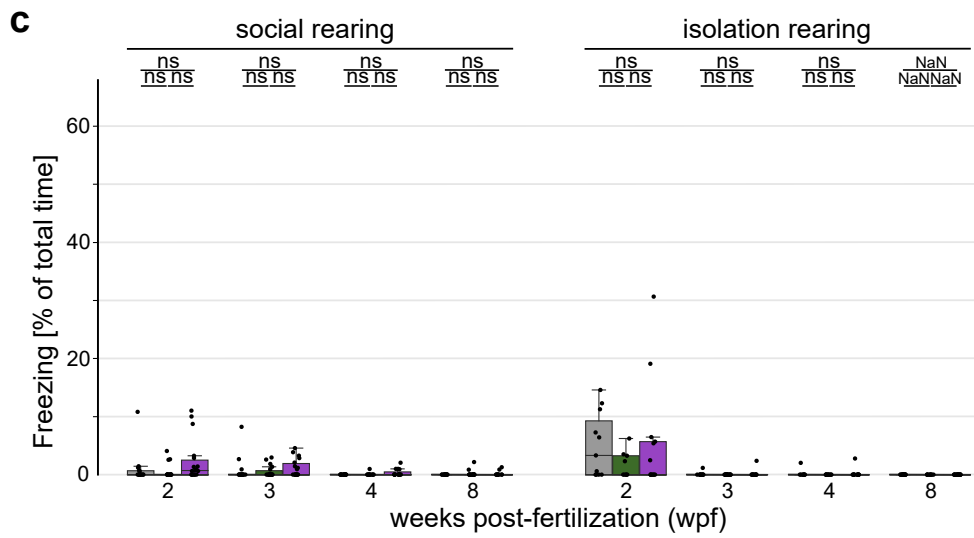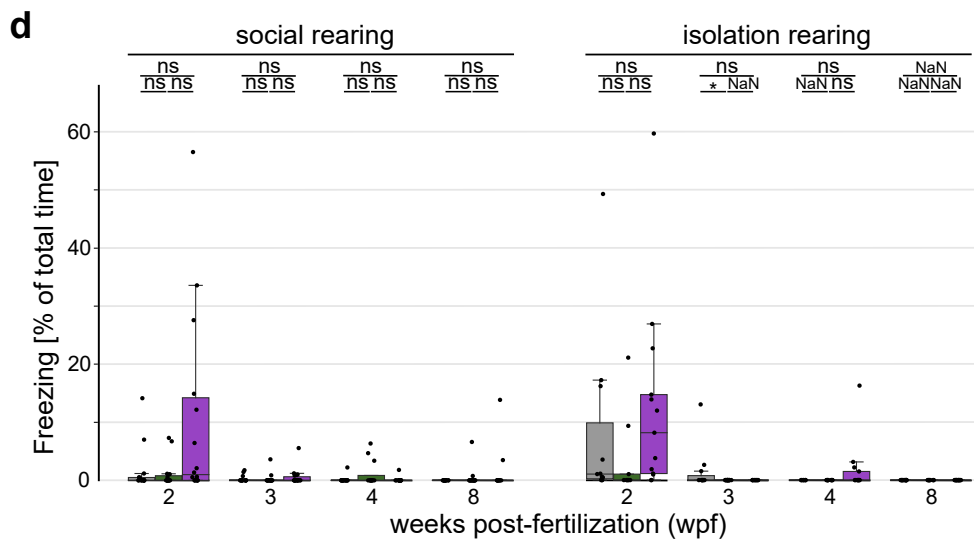

### Supplementary Figure S3: Swim kinematics in absence and presence of stimulus fish in the social preference test

**(a)** In the absence of stimulus fish (habituation period) the average swim speed of *oxtr*<sup>-/-</sup> fish was significantly increased at 2 and 3 wpf after both social and isolation rearing. This effect was also present in *oxtrl*<sup>-/-</sup> fish of the same age, with exception of 3-week-old *oxtrl*<sup>-/-</sup> after isolation rearing. In contrast, socially reared *oxtrl*<sup>-/-</sup> showed significantly reduced swimming speed at 4 wpf. Knocking out one of the Oxytocin receptors did not alter the swimming speed of isolation reared 4-week-old fish and 8-week old fish independent of the rearing condition. n of experimental fish: see below. Kruskal-Wallis-Test:  $p(\text{social } 2\text{wpf}) = 3.49 \times 10^{-4}$ ,  $p(\text{social } 3\text{wpf}) = 1.97 \times 10^{-4}$ ,  $p(\text{social } 4\text{wpf}) = 4.71 \times 10^{-3}$ ,  $p(\text{social } 8\text{wpf}) = 9.84 \times 10^{-2}$ ,  $p(\text{isolated } 2\text{wpf}) = 3.48 \times 10^{-4}$ ,  $p(\text{isolated } 3\text{wpf}) = 3.22 \times 10^{-5}$ ,  $p(\text{isolated } 4\text{wpf}) = 3.86 \times 10^{-1}$ ,  $p(\text{isolated } 8\text{wpf}) = 2.70 \times 10^{-1}$ , Post-hoc Wilcoxon rank-sum test for social 2 wpf:  $p(\text{social } 2\text{wpf, wt} \leftrightarrow \text{oxtr}^{-/-}) = 6.69 \times 10^{-4}$ ,  $p(\text{social } 2\text{wpf, wt} \leftrightarrow \text{oxtrl}^{-/-}) = 3.81 \times 10^{-3}$ ,  $p(\text{social } 2\text{wpf, oxtr}^{-/-} \leftrightarrow \text{oxtrl}^{-/-}) = 2.86 \times 10^{-1}$ , Post-hoc Wilcoxon rank-sum test for social 3 wpf:  $p(\text{social } 3\text{wpf, wt} \leftrightarrow \text{oxtr}^{-/-}) = 6.33 \times 10^{-4}$ ,  $p(\text{social } 3\text{wpf, wt} \leftrightarrow \text{oxtrl}^{-/-}) = 8.33 \times 10^{-4}$ ,  $p(\text{social } 3\text{wpf, oxtr}^{-/-} \leftrightarrow \text{oxtrl}^{-/-}) = 6.92 \times 10^{-1}$ , Post-hoc Wilcoxon rank-sum test for social 4 wpf:  $p(\text{social } 4\text{wpf, wt} \leftrightarrow \text{oxtr}^{-/-}) = 2.36 \times 10^{-1}$ ,  $p(\text{social } 4\text{wpf, wt} \leftrightarrow \text{oxtrl}^{-/-}) = 1.25 \times 10^{-2}$ ,  $p(\text{social } 4\text{wpf, oxtr}^{-/-} \leftrightarrow \text{oxtrl}^{-/-}) = 2.06 \times 10^{-2}$ , Post-hoc Wilcoxon rank-sum test for isolated 2 wpf:  $p(\text{isolated } 2\text{wpf, wt} \leftrightarrow \text{oxtr}^{-/-}) = 2.49 \times 10^{-3}$ ,  $p(\text{isolated } 2\text{wpf, wt} \leftrightarrow \text{oxtrl}^{-/-}) = 3.21 \times 10^{-3}$ ,  $p(\text{isolated } 2\text{wpf, oxtr}^{-/-} \leftrightarrow \text{oxtrl}^{-/-}) = 8.25 \times 10^{-2}$ , Post-hoc Wilcoxon rank-sum test for isolated 3 wpf:  $p(\text{isolated } 3\text{wpf, wt} \leftrightarrow \text{oxtr}^{-/-}) = 6.48 \times 10^{-5}$ ,  $p(\text{isolated } 3\text{wpf, wt} \leftrightarrow \text{oxtrl}^{-/-}) = 6.94 \times 10^{-2}$ ,  $p(\text{isolated } 3\text{wpf, oxtr}^{-/-} \leftrightarrow \text{oxtrl}^{-/-}) = 8.34 \times 10^{-3}$ ,

**(b)** Knocking out one of the Oxytocin receptors leads to increased swim speed in presence of stimulus fish at 2 and 3 wpf after both social and isolation rearing. Except for a decrease in 8-week-old *oxtr*<sup>-/-</sup> after isolation rearing, the average swim speed was not altered in both *oxtr*<sup>-/-</sup> and *oxtrl*<sup>-/-</sup> at 4 and 8 wpf. n of test fish: see below.

Kruskal-Wallis-Test:  $p(\text{social } 2\text{wpf}) = 2.08 \times 10^{-3}$ ,  $p(\text{social } 3\text{wpf}) = 7.97 \times 10^{-4}$ ,  $p(\text{social } 4\text{wpf}) = 3.04 \times 10^{-1}$ ,  $p(\text{social } 8\text{wpf}) = 6.61 \times 10^{-1}$ ,  $p(\text{isolated } 2\text{wpf}) = 6.03 \times 10^{-5}$ ,  $p(\text{isolated } 3\text{wpf}) = 8.11 \times 10^{-6}$ ,  $p(\text{isolated } 4\text{wpf}) = 1.19 \times 10^{-1}$ ,  $p(\text{isolated } 8\text{wpf}) = 1.23 \times 10^{-2}$ , Post-hoc Wilcoxon rank-sum test for social 2 wpf:  $p(\text{social } 2\text{wpf, wt} \leftrightarrow \text{oxtr}^{-/-}) = 5.67 \times 10^{-4}$ ,  $p(\text{social } 2\text{wpf, wt} \leftrightarrow \text{oxtrl}^{-/-}) = 6.17 \times 10^{-2}$ ,  $p(\text{social } 2\text{wpf, oxtr}^{-/-} \leftrightarrow \text{oxtrl}^{-/-}) = 3.38 \times 10^{-1}$ , Post-hoc Wilcoxon rank-sum test for social 3 wpf:  $p(\text{social } 3\text{wpf, wt} \leftrightarrow \text{oxtr}^{-/-}) = 1.46 \times 10^{-2}$ ,  $p(\text{social } 3\text{wpf, wt} \leftrightarrow \text{oxtrl}^{-/-}) = 6.33 \times 10^{-4}$ ,  $p(\text{social } 3\text{wpf, oxtr}^{-/-} \leftrightarrow \text{oxtrl}^{-/-}) = 3.04 \times 10^{-1}$ , Post-hoc Wilcoxon rank-sum test for isolated 2 wpf:  $p(\text{isolated } 2\text{wpf, wt} \leftrightarrow \text{oxtr}^{-/-}) = 7.98 \times 10^{-4}$ ,  $p(\text{isolated } 2\text{wpf, wt} \leftrightarrow \text{oxtrl}^{-/-}) = 1.27 \times 10^{-2}$ ,  $p(\text{isolated } 2\text{wpf, oxtr}^{-/-} \leftrightarrow \text{oxtrl}^{-/-}) = 1.95 \times 10^{-3}$ , Post-hoc Wilcoxon rank-sum test for isolated 3 wpf:  $p(\text{isolated } 3\text{wpf, wt} \leftrightarrow \text{oxtr}^{-/-}) = 1.43 \times 10^{-4}$ ,  $p(\text{isolated } 3\text{wpf, wt} \leftrightarrow \text{oxtrl}^{-/-}) = 7.40 \times 10^{-3}$ ,  $p(\text{isolated } 3\text{wpf, oxtr}^{-/-} \leftrightarrow \text{oxtrl}^{-/-}) = 1.34 \times 10^{-3}$ , Post-hoc Wilcoxon rank-sum test for isolated 8 wpf:  $p(\text{isolated } 8\text{wpf, wt} \leftrightarrow \text{oxtr}^{-/-}) = 1.23 \times 10^{-2}$ ,  $p(\text{isolated } 8\text{wpf, wt} \leftrightarrow \text{oxtrl}^{-/-}) = 5.77 \times 10^{-1}$ ,  $p(\text{isolated } 8\text{wpf, oxtr}^{-/-} \leftrightarrow \text{oxtrl}^{-/-}) = 3.35 \times 10^{-2}$ .



**(c)** Freezing behavior in the absence of conspecifics was not significantly influenced by the knock-out of one of the Oxytocin receptors at 2 to 8 wpf after both social and isolation rearing. n of test fish: see below. Kruskal-Wallis-Test:  $p(\text{social } 2\text{wpf}) = 6.57 \times 10^{-2}$ ,  $p(\text{social } 3\text{wpf}) = 2.71 \times 10^{-1}$ ,  $p(\text{social } 4\text{wpf}) = 6.25 \times 10^{-2}$ ,  $p(\text{social } 8\text{wpf}) = 2.91 \times 10^{-1}$ ,  $p(\text{isolated } 2\text{wpf}) = 4.05 \times 10^{-1}$ ,  $p(\text{isolated } 3\text{wpf}) = 4.48 \times 10^{-1}$ ,  $p(\text{isolated } 4\text{wpf}) = 5.67 \times 10^{-1}$ ,  $p(\text{isolated } 8\text{wpf}) = \text{NaN}$  (all values equal).

**(d)** In the presence of stimulus fish, freezing behavior was not altered in 2 to 8-week old *oxtr*<sup>-/-</sup> and *oxtrl*<sup>-/-</sup> after both social and isolation rearing. n of test fish: see below. Kruskal-Wallis-Test:  $p(\text{social } 2\text{wpf}) = 5.36 \times 10^{-2}$ ,  $p(\text{social } 3\text{wpf}) = 4.79 \times 10^{-1}$ ,  $p(\text{social } 4\text{wpf}) = 1.90 \times 10^{-1}$ ,  $p(\text{social } 8\text{wpf}) = 3.05 \times 10^{-1}$ ,  $p(\text{isolated } 2\text{wpf}) = 6.11 \times 10^{-2}$ ,  $p(\text{isolated } 3\text{wpf}) = 1.36 \times 10^{-2}$ ,  $p(\text{isolated } 4\text{wpf}) = 3.41 \times 10^{-2}$ ,  $p(\text{isolated } 8\text{wpf}) = \text{NaN}$  (all values equal), Post-hoc Wilcoxon rank-sum test for isolated 3 wpf:  $p(\text{isolated } 3\text{wpf}, \text{wt} \leftrightarrow \text{oxtr}^{-/-}) = 4.86 \times 10^{-2}$ ,  $p(\text{isolated } 3\text{wpf}, \text{wt} \leftrightarrow \text{oxtrl}^{-/-}) = 6.59 \times 10^{-2}$ ,  $p(\text{isolated } 3\text{wpf}, \text{oxtr}^{-/-} \leftrightarrow \text{oxtrl}^{-/-}) = \text{NaN}$  (all values equal), Post-hoc Wilcoxon rank-sum test for isolated 4 wpf:  $p(\text{isolated } 4\text{wpf}, \text{wt} \leftrightarrow \text{oxtr}^{-/-}) = \text{NaN}$  (all values equal),  $p(\text{isolated } 4\text{wpf}, \text{wt} \leftrightarrow \text{oxtrl}^{-/-}) = 8.25 \times 10^{-2}$ ,  $p(\text{isolated } 4\text{wpf}, \text{oxtr}^{-/-} \leftrightarrow \text{oxtrl}^{-/-}) = 8.25 \times 10^{-2}$ ,

Number of experimental fish per group:  $n(\text{social wildtype}, 2 \text{ wpf}) = 15$ ,  $n(\text{social wildtype}, 3 \text{ wpf}) = 15$ ,  $n(\text{social wildtype}, 4 \text{ wpf}) = 16$ ,  $n(\text{social wildtype}, 8 \text{ wpf}) = 13$ ,  $n(\text{social } \text{oxtr}^{-/-}, 2 \text{ wpf}) = 15$ ,  $n(\text{social } \text{oxtr}^{-/-}, 3 \text{ wpf}) = 18$ ,  $n(\text{social } \text{oxtr}^{-/-}, 4 \text{ wpf}) = 12$ ,  $n(\text{social } \text{oxtr}^{-/-}, 8 \text{ wpf}) = 16$ ,  $n(\text{social } \text{oxtrl}^{-/-}, 2 \text{ wpf}) = 18$ ,  $n(\text{social } \text{oxtrl}^{-/-}, 3 \text{ wpf}) = 18$ ,  $n(\text{social } \text{oxtrl}^{-/-}, 4 \text{ wpf}) = 15$ ,  $n(\text{social } \text{oxtrl}^{-/-}, 8 \text{ wpf}) = 11$ .  $n(\text{isolated wildtype}, 2 \text{ wpf}) = 11$ ,  $n(\text{isolated wildtype}, 3 \text{ wpf}) = 11$ ,  $n(\text{isolated wildtype}, 4 \text{ wpf}) = 9$ ,  $n(\text{isolated wildtype}, 8 \text{ wpf}) = 16$ ,  $n(\text{isolated } \text{oxtr}^{-/-}, 2 \text{ wpf}) = 9$ ,  $n(\text{isolated } \text{oxtr}^{-/-}, 3 \text{ wpf}) = 18$ ,  $n(\text{isolated } \text{oxtr}^{-/-}, 4 \text{ wpf}) = 11$ ,  $n(\text{isolated } \text{oxtr}^{-/-}, 8 \text{ wpf}) = 10$ ,  $n(\text{isolated } \text{oxtrl}^{-/-}, 2 \text{ wpf}) = 13$ ,  $n(\text{isolated } \text{oxtrl}^{-/-}, 3 \text{ wpf}) = 12$ ,  $n(\text{isolated } \text{oxtrl}^{-/-}, 4 \text{ wpf}) = 13$ ,  $n(\text{isolated } \text{oxtrl}^{-/-}, 8 \text{ wpf}) = 17$ . Each dot represents one experimental fish. Asterisks represent the statistical comparison between genotypes at different ages.

Number of replicates (n) and excluded n can be found in Supplementary Table S1, significance values in Supplementary Table S2. Significance is reported as \* $p < 0.05$ , \*\* $p < 0.01$ , \*\*\* $p < 0.001$ .

color-code: grey = wild-type, green = *oxtr*<sup>-/-</sup>, purple = *oxtrl*<sup>-/-</sup>.

## Supplementary Table S1: Number of biological replicates.

For social preference test, n = number of test fish. For shoaling test, n = number of shoals (20 fish per shoal)

| Social preference test (Figures 1, 2 and S3) |                            |                            |                             |                             |                            |                             |                             |                             |                             |          |                            |                             |
|----------------------------------------------|----------------------------|----------------------------|-----------------------------|-----------------------------|----------------------------|-----------------------------|-----------------------------|-----------------------------|-----------------------------|----------|----------------------------|-----------------------------|
| rearing condition                            | social                     |                            |                             |                             |                            |                             |                             |                             |                             |          |                            |                             |
| age group                                    | 2 wpf                      |                            |                             | 3 wpf                       |                            |                             | 4 wpf                       |                             |                             | 8 wpf    |                            |                             |
| genotype group                               | wildtype                   | <i>oxtr</i> <sup>-/-</sup> | <i>oxtrl</i> <sup>-/-</sup> | wildtype                    | <i>oxtr</i> <sup>-/-</sup> | <i>oxtrl</i> <sup>-/-</sup> | wildtype                    | <i>oxtr</i> <sup>-/-</sup>  | <i>oxtrl</i> <sup>-/-</sup> | wildtype | <i>oxtr</i> <sup>-/-</sup> | <i>oxtrl</i> <sup>-/-</sup> |
| n <sub>(total)</sub>                         | 18                         | 18                         | 18                          | 18                          | 18                         | 18                          | 18                          | 16                          | 18                          | 18       | 18                         | 18                          |
| excluded <sub>(motion)</sub>                 | 3                          | 3                          | 0                           | 3                           | 0                          | 0                           | 2                           | 4                           | 3                           | 5        | 2                          | 7                           |
| excluded <sub>(genotype)</sub>               | 0                          | 0                          | 0                           | 0                           | 0                          | 0                           | 0                           | 0                           | 0                           | 0        | 0                          | 0                           |
| n <sub>(inAnalysis)</sub>                    | 15                         | 15                         | 18                          | 15                          | 18                         | 18                          | 16                          | 12                          | 15                          | 13       | 16                         | 11                          |
| rearing condition                            | isolated                   |                            |                             |                             |                            |                             |                             |                             |                             |          |                            |                             |
| age group                                    | 2 wpf                      |                            |                             | 3 wpf                       |                            |                             | 4 wpf                       |                             |                             | 8 wpf    |                            |                             |
| genotype group                               | wildtype                   | <i>oxtr</i> <sup>-/-</sup> | <i>oxtrl</i> <sup>-/-</sup> | wildtype                    | <i>oxtr</i> <sup>-/-</sup> | <i>oxtrl</i> <sup>-/-</sup> | wildtype                    | <i>oxtr</i> <sup>-/-</sup>  | <i>oxtrl</i> <sup>-/-</sup> | wildtype | <i>oxtr</i> <sup>-/-</sup> | <i>oxtrl</i> <sup>-/-</sup> |
| n <sub>(total)</sub>                         | 16                         | 15                         | 16                          | 17                          | 18                         | 15                          | 15                          | 15                          | 16                          | 18       | 18                         | 18                          |
| excluded <sub>(motion)</sub>                 | 5                          | 6                          | 3                           | 6                           | 0                          | 1                           | 6                           | 2                           | 1                           | 2        | 8                          | 1                           |
| excluded <sub>(genotype)</sub>               | 0                          | 0                          | 0                           | 0                           | 0                          | 2                           | 0                           | 2                           | 2                           | 0        | 0                          | 0                           |
| n <sub>(inAnalysis)</sub>                    | 11                         | 9                          | 13                          | 11                          | 18                         | 12                          | 9                           | 11                          | 13                          | 16       | 10                         | 17                          |
| Shoaling test (Figures 3 and S2)             |                            |                            |                             |                             |                            |                             |                             |                             |                             |          |                            |                             |
| age group                                    | 4 wpf                      |                            |                             |                             | 8 wpf                      |                             |                             |                             |                             |          |                            |                             |
| genotype group                               | <i>oxtr</i> <sup>+/+</sup> | <i>oxtr</i> <sup>-/-</sup> | <i>oxtrl</i> <sup>+/+</sup> | <i>oxtrl</i> <sup>-/-</sup> | <i>oxtr</i> <sup>+/+</sup> | <i>oxtr</i> <sup>-/-</sup>  | <i>oxtrl</i> <sup>+/+</sup> | <i>oxtrl</i> <sup>-/-</sup> |                             |          |                            |                             |
| n <sub>(total)</sub>                         | 26                         | 25                         | 24                          | 29                          | 25                         | 24                          | 25                          | 24                          |                             |          |                            |                             |
| excluded <sub>(genotype)</sub>               | 0                          | 0                          | 9                           | 1                           | 1                          | 3                           | 3                           | 1                           |                             |          |                            |                             |
| n <sub>(inAnalysis)</sub>                    | 26                         | 25                         | 15                          | 28                          | 24                         | 21                          | 22                          | 23                          |                             |          |                            |                             |

**qPCR (Figure S1)**

|                           |  | <i>oxtrl</i> level         |                            |                             |                             | <i>oxtr</i> level          |                            |                             |                             |                    |          |
|---------------------------|--|----------------------------|----------------------------|-----------------------------|-----------------------------|----------------------------|----------------------------|-----------------------------|-----------------------------|--------------------|----------|
| genotype                  |  | <i>oxtr</i> <sup>+/+</sup> | <i>oxtr</i> <sup>-/-</sup> | <i>oxtrl</i> <sup>+/+</sup> | <i>oxtrl</i> <sup>-/-</sup> | <i>oxtr</i> <sup>+/+</sup> | <i>oxtr</i> <sup>-/-</sup> | <i>oxtrl</i> <sup>+/+</sup> | <i>oxtrl</i> <sup>-/-</sup> |                    |          |
| $n_{(\text{inAnalysis})}$ |  | 5                          | 6                          | 4                           | 4                           | 4                          | 2                          | 6                           | 4                           |                    |          |
|                           |  | 4 wpf wildtype             |                            |                             |                             | 8 wpf wildtype             |                            |                             |                             |                    |          |
|                           |  | <i>oxtr</i> level          |                            | <i>oxtr</i> level           |                             | <i>oxtrl</i> level         |                            | <i>oxtr</i> level           |                             | <i>oxtrl</i> level |          |
| rearing                   |  | social                     | isolated                   | social                      | isolated                    | social                     | isolated                   | social                      | isolated                    | social             | isolated |
| $n_{(\text{inAnalysis})}$ |  | 5                          | 6                          | 5                           | 4                           | 5                          | 4                          | 11                          | 10                          | 7                  | 8        |

**Supplementary Table S2: Significance values of statistical tests** (significance is reported as \*p<0.05, \*\*p<0.01 and \*\*\*p<0.001).

|         |                                                                     | Kruskal-Wallis test |                          |                       | Wilcoxon rank-sum test |                                                                |                 |                       |                       |              |
|---------|---------------------------------------------------------------------|---------------------|--------------------------|-----------------------|------------------------|----------------------------------------------------------------|-----------------|-----------------------|-----------------------|--------------|
|         |                                                                     | groups              | effect size ( $\eta^2$ ) | p value               | significance           | groups                                                         | effect size (r) | p value               | p value (corrected)   | significance |
| Fig. 1b | All wildtype, socially reared: 2, 3, 4 and 8 wpf                    |                     | 0.008                    | $9.31 \times 10^{-1}$ | ns                     | All wildtype, socially reared: 2 wpf, 3 wpf                    | 0.045           | $8.03 \times 10^{-1}$ | $8.03 \times 10^{-1}$ | ns           |
|         |                                                                     |                     |                          |                       |                        | All wildtype, socially reared: 2 wpf, 4 wpf                    | 0.096           | $5.93 \times 10^{-1}$ | $8.03 \times 10^{-1}$ | ns           |
|         |                                                                     |                     |                          |                       |                        | All wildtype, socially reared: 2 wpf, 8 wpf                    | 0.061           | $7.47 \times 10^{-1}$ | $8.03 \times 10^{-1}$ | ns           |
|         |                                                                     |                     |                          |                       |                        | All wildtype, socially reared: 3 wpf, 4 wpf                    | 0.067           | $7.07 \times 10^{-1}$ | $8.03 \times 10^{-1}$ | ns           |
|         |                                                                     |                     |                          |                       |                        | All wildtype, socially reared: 3 wpf, 8 wpf                    | 0.074           | $6.95 \times 10^{-1}$ | $8.03 \times 10^{-1}$ | ns           |
|         |                                                                     |                     |                          |                       |                        | All wildtype, socially reared: 4 wpf, 8 wpf                    | 0.057           | $7.59 \times 10^{-1}$ | $8.03 \times 10^{-1}$ | ns           |
|         | All <i>oxtr</i> <sup>-/-</sup> , socially reared: 2, 3, 4 and 8 wpf |                     | 0.168                    | $1.65 \times 10^{-2}$ | *                      | All <i>oxtr</i> <sup>-/-</sup> , socially reared: 2 wpf, 3 wpf | 0.477           | $6.10 \times 10^{-3}$ | $3.66 \times 10^{-2}$ | *            |
|         |                                                                     |                     |                          |                       |                        | All <i>oxtr</i> <sup>-/-</sup> , socially reared: 2 wpf, 4 wpf | 0.160           | $4.07 \times 10^{-1}$ | $6.11 \times 10^{-1}$ | ns           |
|         |                                                                     |                     |                          |                       |                        | All <i>oxtr</i> <sup>-/-</sup> , socially reared: 2 wpf, 8 wpf | 0.092           | $6.07 \times 10^{-1}$ | $6.42 \times 10^{-1}$ | ns           |

|         |                                                                      | Kruskal-Wallis test |          |                         |       | Wilcoxon rank-sum test                                          |       |                         |                         |       |
|---------|----------------------------------------------------------------------|---------------------|----------|-------------------------|-------|-----------------------------------------------------------------|-------|-------------------------|-------------------------|-------|
|         |                                                                      | groups              | $\eta^2$ | p                       | sign. | groups                                                          | r     | p                       | corr. p                 | sign. |
| Fig. 1b | All <i>oxtr</i> <sup>-/-</sup> , socially reared: 2, 3, 4 and 8 wpf  |                     | 0.168    | 1.65 x 10 <sup>-2</sup> | *     | All <i>oxtr</i> <sup>-/-</sup> , socially reared: 3 wpf, 4 wpf  | 0.381 | 3.70 x 10 <sup>-2</sup> | 7.40 x 10 <sup>-2</sup> | ns    |
|         |                                                                      |                     |          |                         |       | All <i>oxtr</i> <sup>-/-</sup> , socially reared: 3 wpf, 8 wpf  | 0.411 | 1.65 x 10 <sup>-2</sup> | 4.95 x 10 <sup>-2</sup> | *     |
|         |                                                                      |                     |          |                         |       | All <i>oxtr</i> <sup>-/-</sup> , socially reared: 4 wpf, 8 wpf  | 0.088 | 6.42 x 10 <sup>-1</sup> | 6.42 x 10 <sup>-1</sup> | ns    |
|         | All <i>oxtrl</i> <sup>-/-</sup> , socially reared: 2, 3, 4 and 8 wpf |                     | 0.365    | 4.09 x 10 <sup>-5</sup> | ***   | All <i>oxtrl</i> <sup>-/-</sup> , socially reared: 2 wpf, 3 wpf | 0.690 | 3.49 x 10 <sup>-5</sup> | 2.09 x 10 <sup>-4</sup> | ***   |
|         |                                                                      |                     |          |                         |       | All <i>oxtrl</i> <sup>-/-</sup> , socially reared: 2 wpf, 4 wpf | 0.670 | 1.18 x 10 <sup>-4</sup> | 3.54 x 10 <sup>-4</sup> | ***   |
|         |                                                                      |                     |          |                         |       | All <i>oxtrl</i> <sup>-/-</sup> , socially reared: 2 wpf, 8 wpf | 0.541 | 3.60 x 10 <sup>-3</sup> | 7.20 x 10 <sup>-3</sup> | **    |
|         |                                                                      |                     |          |                         |       | All <i>oxtrl</i> <sup>-/-</sup> , socially reared: 3 wpf, 4 wpf | 0.003 | 9.86 x 10 <sup>-1</sup> | 9.86 x 10 <sup>-1</sup> | ns    |
|         |                                                                      |                     |          |                         |       | All <i>oxtrl</i> <sup>-/-</sup> , socially reared: 3 wpf, 8 wpf | 0.071 | 7.01 x 10 <sup>-1</sup> | 9.86 x 10 <sup>-1</sup> | ns    |
|         |                                                                      |                     |          |                         |       | All <i>oxtrl</i> <sup>-/-</sup> , socially reared: 4 wpf, 8 wpf | 0.015 | 9.38 x 10 <sup>-1</sup> | 9.86 x 10 <sup>-1</sup> | ns    |

|         |                                                                                                | Kruskal-Wallis test |          |                         | Wilcoxon rank-sum test |                                                                                      |       |                         |                         |       |
|---------|------------------------------------------------------------------------------------------------|---------------------|----------|-------------------------|------------------------|--------------------------------------------------------------------------------------|-------|-------------------------|-------------------------|-------|
|         |                                                                                                | groups              | $\eta^2$ | p                       | sign.                  | groups                                                                               | r     | p                       | corr. p                 | sign. |
| Fig. 1c | All 2 wpf, socially reared: wildtype, <i>oxtr</i> <sup>-/-</sup> , <i>oxtrl</i> <sup>-/-</sup> |                     | 0.061    | 2.25 x 10 <sup>-1</sup> | ns                     | All 2 wpf, socially reared: wildtype, <i>oxtr</i> <sup>-/-</sup>                     | 0.030 | 8.68 x 10 <sup>-1</sup> | 8.68 x 10 <sup>-1</sup> | ns    |
|         |                                                                                                |                     |          |                         |                        | All 2 wpf, socially reared: wildtype, <i>oxtrl</i> <sup>-/-</sup>                    | 0.252 | 1.47 x 10 <sup>-1</sup> | 2.36 x 10 <sup>-1</sup> | ns    |
|         |                                                                                                |                     |          |                         |                        | All 2 wpf, socially reared: <i>oxtr</i> <sup>-/-</sup> , <i>oxtrl</i> <sup>-/-</sup> | 0.247 | 1.57 x 10 <sup>-1</sup> | 2.36 x 10 <sup>-1</sup> | ns    |
|         | All 3 wpf, socially reared: wildtype, <i>oxtr</i> <sup>-/-</sup> , <i>oxtrl</i> <sup>-/-</sup> |                     | 0.147    | 2.35 x 10 <sup>-2</sup> | *                      | All 3 wpf, socially reared: wildtype, <i>oxtr</i> <sup>-/-</sup>                     | 0.416 | 1.68 x 10 <sup>-2</sup> | 2.93 x 10 <sup>-2</sup> | *     |
|         |                                                                                                |                     |          |                         |                        | All 3 wpf, socially reared: wildtype, <i>oxtrl</i> <sup>-/-</sup>                    | 0.407 | 1.95 x 10 <sup>-2</sup> | 2.93 x 10 <sup>-2</sup> | *     |
|         |                                                                                                |                     |          |                         |                        | All 3 wpf, socially reared: <i>oxtr</i> <sup>-/-</sup> , <i>oxtrl</i> <sup>-/-</sup> | 0.064 | 7.00 x 10 <sup>-1</sup> | 7.00 x 10 <sup>-1</sup> | ns    |
|         | All 4 wpf, socially reared: wildtype, <i>oxtr</i> <sup>-/-</sup> , <i>oxtrl</i> <sup>-/-</sup> |                     | 0.158    | 3.61 x 10 <sup>-2</sup> | *                      | All 4 wpf, socially reared: wildtype, <i>oxtr</i> <sup>-/-</sup>                     | 0.018 | 9.26 x 10 <sup>-1</sup> | 9.26 x 10 <sup>-1</sup> | ns    |
|         |                                                                                                |                     |          |                         |                        | All 4 wpf, socially reared: wildtype, <i>oxtrl</i> <sup>-/-</sup>                    | 0.405 | 2.41 x 10 <sup>-2</sup> | 5.34 x 10 <sup>-2</sup> | ns    |
|         |                                                                                                |                     |          |                         |                        | All 4 wpf, socially reared: <i>oxtr</i> <sup>-/-</sup> , <i>oxtrl</i> <sup>-/-</sup> | 0.404 | 3.56 x 10 <sup>-2</sup> | 5.34 x 10 <sup>-2</sup> | ns    |

|         |                                                                                                | Kruskal-Wallis test |                         |    | Wilcoxon rank-sum test                                                               |        |                         |                         |         |       |
|---------|------------------------------------------------------------------------------------------------|---------------------|-------------------------|----|--------------------------------------------------------------------------------------|--------|-------------------------|-------------------------|---------|-------|
|         |                                                                                                | groups              | $\eta^2$                | p  | sign.                                                                                | groups | r                       | p                       | corr. p | sign. |
| Fig. 1c | All 8 wpf, socially reared: wildtype, <i>oxtr</i> <sup>-/-</sup> , <i>oxtrl</i> <sup>-/-</sup> | 0.064               | 2.87 x 10 <sup>-1</sup> | ns | All 8 wpf, socially reared: wildtype, <i>oxtr</i> <sup>-/-</sup>                     | 0.024  | 8.95 x 10 <sup>-1</sup> | 8.95 x 10 <sup>-1</sup> | ns      |       |
|         |                                                                                                |                     |                         |    | All 8 wpf, socially reared: wildtype, <i>oxtrl</i> <sup>-/-</sup>                    | 0.058  | 2.83 x 10 <sup>-1</sup> | 4.25 x 10 <sup>-1</sup> | ns      |       |
|         |                                                                                                |                     |                         |    | All 8 wpf, socially reared: <i>oxtr</i> <sup>-/-</sup> , <i>oxtrl</i> <sup>-/-</sup> | 0.304  | 1.14 x 10 <sup>-1</sup> | 3.42 x 10 <sup>-1</sup> | ns      |       |
| Fig 2b  | All 2 wpf, isolated reared: wildtype, <i>oxtr</i> <sup>-/-</sup> , <i>oxtrl</i> <sup>-/-</sup> | 0.106               | 1.85 x 10 <sup>-1</sup> | ns | All 2 wpf, isolated reared: wildtype, <i>oxtr</i> <sup>-/-</sup>                     | 0.357  | 1.11 x 10 <sup>-1</sup> | 2.22 x 10 <sup>-1</sup> | ns      |       |
|         |                                                                                                |                     |                         |    | All 2 wpf, isolated reared: wildtype, <i>oxtrl</i> <sup>-/-</sup>                    | 0.296  | 1.48 x 10 <sup>-1</sup> | 2.22 x 10 <sup>-1</sup> | ns      |       |
|         |                                                                                                |                     |                         |    | All 2 wpf, isolated reared: <i>oxtr</i> <sup>-/-</sup> , <i>oxtrl</i> <sup>-/-</sup> | 0.085  | 6.89 x 10 <sup>-1</sup> | 6.89 x 10 <sup>-1</sup> | ns      |       |
|         | All 3 wpf, isolated reared: wildtype, <i>oxtr</i> <sup>-/-</sup> , <i>oxtrl</i> <sup>-/-</sup> | 0.052               | 3.51 x 10 <sup>-1</sup> | ns | All 3 wpf, isolated reared: wildtype, <i>oxtr</i> <sup>-/-</sup>                     | 0.271  | 1.44 x 10 <sup>-1</sup> | 4.32 x 10 <sup>-1</sup> | ns      |       |
|         |                                                                                                |                     |                         |    | All 3 wpf, isolated reared: wildtype, <i>oxtrl</i> <sup>-/-</sup>                    | 0.173  | 4.06 x 10 <sup>-1</sup> | 6.09 x 10 <sup>-1</sup> | ns      |       |
|         |                                                                                                |                     |                         |    | All 3 wpf, isolated reared: <i>oxtr</i> <sup>-/-</sup> , <i>oxtrl</i> <sup>-/-</sup> | 0.066  | 7.19 x 10 <sup>-1</sup> | 7.19 x 10 <sup>-1</sup> | ns      |       |

|         |                                                                                                | Kruskal-Wallis test |          |                         |       | Wilcoxon rank-sum test                                                               |       |                         |                         |       |
|---------|------------------------------------------------------------------------------------------------|---------------------|----------|-------------------------|-------|--------------------------------------------------------------------------------------|-------|-------------------------|-------------------------|-------|
|         |                                                                                                | groups              | $\eta^2$ | p                       | sign. | groups                                                                               | r     | p                       | corr. p                 | sign. |
| Fig. 2b | All 4 wpf, isolated reared: wildtype, <i>oxtr</i> <sup>-/-</sup> , <i>oxtrl</i> <sup>-/-</sup> |                     | 0.396    | 1.80 x 10 <sup>-3</sup> | **    | All 4 wpf, isolated reared: wildtype, <i>oxtr</i> <sup>-/-</sup>                     | 0.476 | 3.34 x 10 <sup>-2</sup> | 5.01 x 10 <sup>-2</sup> | ns    |
|         |                                                                                                |                     |          |                         |       | All 4 wpf, isolated reared: wildtype, <i>oxtrl</i> <sup>-/-</sup>                    | 0.712 | 8.41 x 10 <sup>-4</sup> | 2.52 x 10 <sup>-3</sup> | **    |
|         |                                                                                                |                     |          |                         |       | All 4 wpf, isolated reared: <i>oxtr</i> <sup>-/-</sup> , <i>oxtrl</i> <sup>-/-</sup> | 0.343 | 9.29 x 10 <sup>-2</sup> | 9.29 x 10 <sup>-2</sup> | ns    |
|         | All 8 wpf, isolated reared: wildtype, <i>oxtr</i> <sup>-/-</sup> , <i>oxtrl</i> <sup>-/-</sup> |                     | 0.035    | 4.82 x 10 <sup>-1</sup> | ns    | All 8 wpf, isolated reared: wildtype, <i>oxtr</i> <sup>-/-</sup>                     | 0.088 | 6.54 x 10 <sup>-1</sup> | 7.07 x 10 <sup>-1</sup> | ns    |
|         |                                                                                                |                     |          |                         |       | All 8 wpf, isolated reared: wildtype, <i>oxtrl</i> <sup>-/-</sup>                    | 0.216 | 2.14 x 10 <sup>-1</sup> | 6.42 x 10 <sup>-1</sup> | ns    |
|         |                                                                                                |                     |          |                         |       | All 8 wpf, isolated reared: <i>oxtr</i> <sup>-/-</sup> , <i>oxtrl</i> <sup>-/-</sup> | 0.072 | 7.07 x 10 <sup>-1</sup> | 7.07 x 10 <sup>-1</sup> | ns    |
| Fig. 2c | All wildtype, all age groups: social, isolated                                                 |                     | 0.186    | 6.70 x 10 <sup>-3</sup> | **    | All 2 wpf wildtype: social, isolated                                                 | 0.224 | 2.54 x 10 <sup>-1</sup> | 3.39 x 10 <sup>-1</sup> | ns    |
|         |                                                                                                |                     |          |                         |       | All 3 wpf wildtype: social, isolated                                                 | 0.010 | 9.59 x 10 <sup>-1</sup> | 9.59 x 10 <sup>-1</sup> | ns    |
|         |                                                                                                |                     |          |                         |       | All 4 wpf wildtype: social, isolated                                                 | 0.255 | 2.03 x 10 <sup>-1</sup> | 3.39 x 10 <sup>-1</sup> | ns    |
|         |                                                                                                |                     |          |                         |       | All 8 wpf wildtype: social, isolated                                                 | 0.533 | 4.10 x 10 <sup>-3</sup> | 1.64 x 10 <sup>-2</sup> | *     |



|         |                                                                                                                                                                                              | Kruskal-Wallis test |          |                         |       | Wilcoxon rank-sum test                                                                      |       |                         |                         |       |
|---------|----------------------------------------------------------------------------------------------------------------------------------------------------------------------------------------------|---------------------|----------|-------------------------|-------|---------------------------------------------------------------------------------------------|-------|-------------------------|-------------------------|-------|
|         |                                                                                                                                                                                              | groups              | $\eta^2$ | p                       | sign. | groups                                                                                      | r     | p                       | corr. p                 | sign. |
| Fig. 2c | All <i>oxtr</i> <sup>-/-</sup> ,<br>all age groups:<br>social, isolated                                                                                                                      |                     | 0.256    | 2.00 x 10 <sup>-4</sup> | ***   | All 2 wpf <i>oxtr</i> <sup>-/-</sup> :<br>social, isolated                                  | 0.170 | 4.09 x 10 <sup>-1</sup> | 4.09 x 10 <sup>-1</sup> | ns    |
|         |                                                                                                                                                                                              |                     |          |                         |       | All 3 wpf <i>oxtr</i> <sup>-/-</sup> :<br>social, isolated                                  | 0.158 | 3.45 x 10 <sup>-1</sup> | 4.09 x 10 <sup>-1</sup> | ns    |
|         |                                                                                                                                                                                              |                     |          |                         |       | All 4 wpf <i>oxtr</i> <sup>-/-</sup> :<br>social, isolated                                  | 0.225 | 2.82 x 10 <sup>-1</sup> | 4.09 x 10 <sup>-1</sup> | ns    |
|         |                                                                                                                                                                                              |                     |          |                         |       | All 8 wpf <i>oxtr</i> <sup>-/-</sup> :<br>social, isolated                                  | 0.357 | 6.90 x 10 <sup>-2</sup> | 2.76 x 10 <sup>-1</sup> | ns    |
|         | All <i>oxtrl</i> <sup>-/-</sup> ,<br>all age groups:<br>social, isolated                                                                                                                     |                     | 0.435    | 7.79 x 10 <sup>-9</sup> | ***   | All 2 wpf <i>oxtrl</i> <sup>-/-</sup> :<br>social, isolated                                 | 0.328 | 6.82 x 10 <sup>-2</sup> | 9.09 x 10 <sup>-2</sup> | ns    |
|         |                                                                                                                                                                                              |                     |          |                         |       | All 3 wpf <i>oxtrl</i> <sup>-/-</sup> :<br>social, isolated                                 | 0.171 | 3.50 x 10 <sup>-1</sup> | 3.50 x 10 <sup>-1</sup> | ns    |
|         |                                                                                                                                                                                              |                     |          |                         |       | All 4 wpf <i>oxtrl</i> <sup>-/-</sup> :<br>social, isolated                                 | 0.750 | 8.94 x 10 <sup>-5</sup> | 3.58 x 10 <sup>-4</sup> | ***   |
|         |                                                                                                                                                                                              |                     |          |                         |       | All 8 wpf <i>oxtrl</i> <sup>-/-</sup> :<br>social, isolated                                 | 0.507 | 7.30 x 10 <sup>-3</sup> | 1.46 x 10 <sup>-2</sup> | *     |
| Fig. 3a | Nearest-neighbor distance (NND),<br>all 4 wpf,<br>socially reared:<br><i>oxtr</i> <sup>+/+</sup> , <i>oxtr</i> <sup>-/-</sup> ,<br><i>oxtrl</i> <sup>+/+</sup> , <i>oxtrl</i> <sup>-/-</sup> |                     | 0.080    | 1.69 x 10 <sup>-2</sup> | *     | All 4 wpf,<br>socially reared:<br><i>oxtr</i> <sup>+/+</sup> , <i>oxtr</i> <sup>-/-</sup>   | 0.011 | 4.74 x 10 <sup>-1</sup> | 4.74 x 10 <sup>-1</sup> | ns    |
|         |                                                                                                                                                                                              |                     |          |                         |       | All 4 wpf,<br>socially reared:<br><i>oxtrl</i> <sup>+/+</sup> , <i>oxtrl</i> <sup>-/-</sup> | 0.124 | 2.11 x 10 <sup>-1</sup> | 3.17 x 10 <sup>-1</sup> | ns    |
|         |                                                                                                                                                                                              |                     |          |                         |       | All 4 wpf,<br>socially reared:<br><i>oxtr</i> <sup>+/+</sup> , <i>oxtrl</i> <sup>+/+</sup>  | 0.199 | 1.04 x 10 <sup>-1</sup> | 3.12 x 10 <sup>-1</sup> | ns    |
|         | See page below                                                                                                                                                                               |                     | 0.229    | 4.72 x 10 <sup>-5</sup> | ***   | All 8 wpf,<br>socially reared:<br><i>oxtr</i> <sup>+/+</sup> , <i>oxtr</i> <sup>-/-</sup>   | 0.488 | 5.48 x 10 <sup>-4</sup> | 1.64 x 10 <sup>-3</sup> | **    |

|         | Kruskal-Wallis test                                                                                                                                                                       |          |                         |       | Wilcoxon rank-sum test                                                                      |       |                         |                         |       |
|---------|-------------------------------------------------------------------------------------------------------------------------------------------------------------------------------------------|----------|-------------------------|-------|---------------------------------------------------------------------------------------------|-------|-------------------------|-------------------------|-------|
|         | groups                                                                                                                                                                                    | $\eta^2$ | p                       | sign. | groups                                                                                      | r     | p                       | corr. p                 | sign. |
| Fig. 3a | NND,<br>all 8 wpf,<br>socially reared:<br><i>oxtr</i> <sup>+/+</sup> , <i>oxtr</i> <sup>-/-</sup> ,<br><i>oxtrl</i> <sup>+/+</sup> , <i>oxtrl</i> <sup>-/-</sup>                          | 0.229    | 4.72 x 10 <sup>-5</sup> | ***   | All 8 wpf,<br>socially reared:<br><i>oxtrl</i> <sup>+/+</sup> , <i>oxtrl</i> <sup>-/-</sup> | 0.288 | 2.75 x 10 <sup>-2</sup> | 4.13 x 10 <sup>-2</sup> | *     |
|         |                                                                                                                                                                                           |          |                         |       | All 8 wpf,<br>socially reared:<br><i>oxtr</i> <sup>+/+</sup> , <i>oxtr</i> <sup>+/+</sup>   | 0.240 | 5.30 x 10 <sup>-2</sup> | 5.30 x 10 <sup>-2</sup> | ns    |
| Fig. 3b | Inter-individual<br>distance,<br>all 4 wpf,<br>socially reared:<br><i>oxtr</i> <sup>+/+</sup> , <i>oxtr</i> <sup>-/-</sup> ,<br><i>oxtrl</i> <sup>+/+</sup> , <i>oxtrl</i> <sup>-/-</sup> | 0.017    | 2.07 x 10 <sup>-1</sup> | ns    | All 4 wpf,<br>socially reared:<br><i>oxtr</i> <sup>+/+</sup> , <i>oxtr</i> <sup>-/-</sup>   | 0.042 | 3.85 x 10 <sup>-1</sup> | 4.09 x 10 <sup>-1</sup> | ns    |
|         |                                                                                                                                                                                           |          |                         |       | All 4 wpf,<br>socially reared:<br><i>oxtrl</i> <sup>+/+</sup> , <i>oxtrl</i> <sup>-/-</sup> | 0.210 | 8.64 x 10 <sup>-2</sup> | 2.59 x 10 <sup>-1</sup> | ns    |
|         |                                                                                                                                                                                           |          |                         |       | All 4 wpf,<br>socially reared:<br><i>oxtr</i> <sup>+/+</sup> , <i>oxtrl</i> <sup>+/+</sup>  | 0.038 | 4.09 x 10 <sup>-1</sup> | 4.09 x 10 <sup>-1</sup> | ns    |
|         | Inter-individual<br>distance,<br>all 8 wpf,<br>socially reared:<br><i>oxtr</i> <sup>+/+</sup> , <i>oxtr</i> <sup>-/-</sup> ,<br><i>oxtrl</i> <sup>+/+</sup> , <i>oxtrl</i> <sup>-/-</sup> | 0.133    | 2.40 x 10 <sup>-3</sup> | **    | All 8 wpf,<br>socially reared:<br><i>oxtr</i> <sup>+/+</sup> , <i>oxtr</i> <sup>-/-</sup>   | 0.390 | 4.59 x 10 <sup>-3</sup> | 1.38 x 10 <sup>-2</sup> | *     |
|         |                                                                                                                                                                                           |          |                         |       | All 8 wpf,<br>socially reared:<br><i>oxtrl</i> <sup>+/+</sup> , <i>oxtrl</i> <sup>-/-</sup> | 0.332 | 1.34 x 10 <sup>-2</sup> | 2.01 x 10 <sup>-2</sup> | *     |
|         |                                                                                                                                                                                           |          |                         |       | All 8 wpf,<br>socially reared:<br><i>oxtr</i> <sup>+/+</sup> , <i>oxtrl</i> <sup>+/+</sup>  | 0.204 | 8.47 x 10 <sup>-2</sup> | 8.47 x 10 <sup>-2</sup> | ns    |
| Fig. 3c | See page below                                                                                                                                                                            | 0.006    | 4.79 x 10 <sup>-1</sup> | ns    | All 4 wpf,<br>socially reared:<br><i>oxtr</i> <sup>+/+</sup> , <i>oxtr</i> <sup>-/-</sup>   | 0.011 | 4.74 x 10 <sup>-1</sup> | 4.74 x 10 <sup>-1</sup> | ns    |

|                                                                                                                                                                    |                                                                                                                                                                             | Kruskal-Wallis test                                                                                                                                                |          |                         |                         | Wilcoxon rank-sum test                                                                |                                                                                     |                         |                         |                         |
|--------------------------------------------------------------------------------------------------------------------------------------------------------------------|-----------------------------------------------------------------------------------------------------------------------------------------------------------------------------|--------------------------------------------------------------------------------------------------------------------------------------------------------------------|----------|-------------------------|-------------------------|---------------------------------------------------------------------------------------|-------------------------------------------------------------------------------------|-------------------------|-------------------------|-------------------------|
|                                                                                                                                                                    |                                                                                                                                                                             | groups                                                                                                                                                             | $\eta^2$ | p                       | sign.                   | groups                                                                                | r                                                                                   | p                       | corr. p                 | sign.                   |
| Fig. 3c                                                                                                                                                            | Farthest-neighbor distance, all 4 wpf, socially reared: <i>oxtr</i> <sup>+/+</sup> , <i>oxtr</i> <sup>-/-</sup> , <i>oxtrl</i> <sup>+/+</sup> , <i>oxtrl</i> <sup>-/-</sup> |                                                                                                                                                                    | 0.006    | 4.79 x 10 <sup>-1</sup> | ns                      | All 4 wpf, socially reared: <i>oxtrl</i> <sup>+/+</sup> , <i>oxtrl</i> <sup>-/-</sup> | 0.218                                                                               | 7.86 x 10 <sup>-2</sup> | 1.29 x 10 <sup>-1</sup> | ns                      |
|                                                                                                                                                                    |                                                                                                                                                                             |                                                                                                                                                                    |          |                         |                         | All 4 wpf, socially reared: <i>oxtr</i> <sup>+/+</sup> , <i>oxtrl</i> <sup>+/+</sup>  | 0.216                                                                               | 8.58 x 10 <sup>-2</sup> | 1.29 x 10 <sup>-1</sup> | ns                      |
|                                                                                                                                                                    | Farthest-neighbor distance, all 8 wpf, socially reared: <i>oxtr</i> <sup>+/+</sup> , <i>oxtr</i> <sup>-/-</sup> , <i>oxtrl</i> <sup>+/+</sup> , <i>oxtrl</i> <sup>-/-</sup> |                                                                                                                                                                    | 0.130    | 2.65 x 10 <sup>-3</sup> | **                      | All 8 wpf, socially reared: <i>oxtr</i> <sup>+/+</sup> , <i>oxtr</i> <sup>-/-</sup>   | 0.359                                                                               | 8.19 x 10 <sup>-3</sup> | 1.91 x 10 <sup>-2</sup> | *                       |
|                                                                                                                                                                    |                                                                                                                                                                             |                                                                                                                                                                    |          |                         |                         | All 8 wpf, socially reared: <i>oxtrl</i> <sup>+/+</sup> , <i>oxtrl</i> <sup>-/-</sup> | 0.335                                                                               | 1.27 x 10 <sup>-2</sup> | 1.91 x 10 <sup>-2</sup> | *                       |
|                                                                                                                                                                    |                                                                                                                                                                             |                                                                                                                                                                    |          |                         |                         | All 8 wpf, socially reared: <i>oxtr</i> <sup>+/+</sup> , <i>oxtrl</i> <sup>+/+</sup>  | 0.240                                                                               | 5.30 x 10 <sup>-2</sup> | 5.30 x 10 <sup>-2</sup> | ns                      |
|                                                                                                                                                                    | Fig. 3d                                                                                                                                                                     | Variance explained, All 4wpf, socially reared: <i>oxtr</i> <sup>+/+</sup> , <i>oxtr</i> <sup>-/-</sup> , <i>oxtrl</i> <sup>+/+</sup> , <i>oxtrl</i> <sup>-/-</sup> |          | 0.020                   | 5.64 x 10 <sup>-1</sup> | ns                                                                                    | All 4 wpf, socially reared: <i>oxtr</i> <sup>+/+</sup> , <i>oxtr</i> <sup>-/-</sup> | 0.020                   | 8.88 x 10 <sup>-1</sup> | 8.88 x 10 <sup>-1</sup> |
| All 4 wpf, socially reared: <i>oxtrl</i> <sup>+/+</sup> , <i>oxtrl</i> <sup>-/-</sup>                                                                              |                                                                                                                                                                             |                                                                                                                                                                    |          |                         |                         |                                                                                       | 0.214                                                                               | 1.60 x 10 <sup>-1</sup> | 4.80 x 10 <sup>-1</sup> | ns                      |
| All 4 wpf, socially reared: <i>oxtr</i> <sup>+/+</sup> , <i>oxtrl</i> <sup>+/+</sup>                                                                               |                                                                                                                                                                             |                                                                                                                                                                    |          |                         |                         |                                                                                       | 0.120                                                                               | 4.43 x 10 <sup>-1</sup> | 6.65 x 10 <sup>-1</sup> | ns                      |
| Variance explained, All 8wpf, socially reared: <i>oxtr</i> <sup>+/+</sup> , <i>oxtr</i> <sup>-/-</sup> , <i>oxtrl</i> <sup>+/+</sup> , <i>oxtrl</i> <sup>-/-</sup> |                                                                                                                                                                             |                                                                                                                                                                    | 0.194    | 7.00 x 10 <sup>-4</sup> | **                      | All 8 wpf, socially reared: <i>oxtr</i> <sup>+/+</sup> , <i>oxtr</i> <sup>-/-</sup>   | 0.357                                                                               | 1.65 x 10 <sup>-2</sup> | 4.95 x 10 <sup>-2</sup> | *                       |
|                                                                                                                                                                    |                                                                                                                                                                             |                                                                                                                                                                    |          |                         |                         | All 8 wpf, socially reared: <i>oxtrl</i> <sup>+/+</sup> , <i>oxtrl</i> <sup>-/-</sup> | 0.293                                                                               | 4.95 x 10 <sup>-2</sup> | 4.95 x 10 <sup>-2</sup> | *                       |

|          | Kruskal-Wallis test                                                                                                                             |          |                       |       | Wilcoxon rank-sum test                                                                |       |                       |                       |       |
|----------|-------------------------------------------------------------------------------------------------------------------------------------------------|----------|-----------------------|-------|---------------------------------------------------------------------------------------|-------|-----------------------|-----------------------|-------|
|          | groups                                                                                                                                          | $\eta^2$ | p                     | sign. | groups                                                                                | r     | p                     | corr. p               | sign. |
| Fig. 3d  | See previous page                                                                                                                               | 0.194    | $7.00 \times 10^{-4}$ | **    | All 8 wpf, socially reared: <i>oxtr</i> <sup>+/+</sup> , <i>oxtrl</i> <sup>+/+</sup>  | 0.314 | $3.31 \times 10^{-2}$ | $4.95 \times 10^{-2}$ | *     |
| Fig. S1b | All 8 wpf, socially reared: <i>oxtr</i> <sup>+/+</sup> , <i>oxtr</i> <sup>-/-</sup> , <i>oxtrl</i> <sup>+/+</sup> , <i>oxtrl</i> <sup>-/-</sup> | 0.034    | $8.80 \times 10^{-1}$ | ns    | All 8 wpf, socially reared: <i>oxtr</i> <sup>+/+</sup> , <i>oxtr</i> <sup>-/-</sup>   | 0.140 | $9.31 \times 10^{-1}$ | $9.31 \times 10^{-1}$ | ns    |
|          |                                                                                                                                                 |          |                       |       | All 8 wpf, socially reared: <i>oxtrl</i> <sup>+/+</sup> , <i>oxtrl</i> <sup>-/-</sup> | 0.179 | $6.10 \times 10^{-1}$ | $9.31 \times 10^{-1}$ | ns    |
| Fig. S1c | <i>oxtr</i> level, all wildtype, all age groups: social, isolated                                                                               | 0.542    | $8.00 \times 10^{-4}$ | ***   | All 4 wpf wildtype: social, isolated                                                  | 0.365 | $3.29 \times 10^{-1}$ | $3.29 \times 10^{-1}$ | ns    |
|          |                                                                                                                                                 |          |                       |       | All 8 wpf wildtype: social, isolated                                                  | 0.511 | $6.70 \times 10^{-3}$ | $1.34 \times 10^{-2}$ | *     |
|          |                                                                                                                                                 |          |                       |       | All wildtype, socially reared: 4 wpf, 8 wpf                                           | 0.643 | $4.58 \times 10^{-4}$ | $1.83 \times 10^{-3}$ | **    |
|          |                                                                                                                                                 |          |                       |       | All wildtype, isolated reared: 4 wpf, 8 wpf                                           | 0.323 | $3.13 \times 10^{-1}$ | $3.29 \times 10^{-1}$ | ns    |
| Fig. S1d | <i>oxtr</i> level, all wildtype, all age groups: social, isolated                                                                               | 0.005    | $9.90 \times 10^{-1}$ | ns    | All 4 wpf wildtype: social, isolated                                                  | 0.071 | $9.05 \times 10^{-1}$ | $9.33 \times 10^{-1}$ | ns    |
|          |                                                                                                                                                 |          |                       |       | All 8 wpf wildtype: social, isolated                                                  | 0.084 | $7.79 \times 10^{-1}$ | $9.33 \times 10^{-1}$ | ns    |

|          |                                                                                                                                                                            | Kruskal-Wallis test |                       |    |                                                                                       | Wilcoxon rank-sum test |                       |                       |         |       |
|----------|----------------------------------------------------------------------------------------------------------------------------------------------------------------------------|---------------------|-----------------------|----|---------------------------------------------------------------------------------------|------------------------|-----------------------|-----------------------|---------|-------|
|          |                                                                                                                                                                            | groups              | $\eta^2$              | p  | sign.                                                                                 | groups                 | r                     | p                     | corr. p | sign. |
| Fig. S1d | <i>oxtr</i> level, all wildtype, all age groups: social, isolated                                                                                                          | 0.005               | $9.90 \times 10^{-1}$ | ns | All wildtype, socially reared: 4 wpf, 8 wpf                                           | 0.103                  | $8.76 \times 10^{-1}$ | $9.33 \times 10^{-1}$ | ns      |       |
|          |                                                                                                                                                                            |                     |                       |    | All wildtype, isolated reared: 4 wpf, 8 wpf                                           | 0.047                  | $9.33 \times 10^{-1}$ | $9.33 \times 10^{-1}$ | ns      |       |
| Fig. S1e | <i>oxtrl</i> level, all wildtype, all age groups: Social, isolated                                                                                                         | 0.004               | $9.91 \times 10^{-1}$ | ns | All 4 wpf wildtype: social, isolated                                                  | 0.088                  | $9.05 \times 10^{-1}$ | $9.05 \times 10^{-1}$ | ns      |       |
|          |                                                                                                                                                                            |                     |                       |    | All 8 wpf wildtype: social, isolated                                                  | 0.083                  | $7.79 \times 10^{-1}$ | $9.05 \times 10^{-1}$ | ns      |       |
|          |                                                                                                                                                                            |                     |                       |    | All wildtype, socially reared: 4 wpf, 8 wpf                                           | 0.001                  | $8.76 \times 10^{-1}$ | $9.05 \times 10^{-1}$ | ns      |       |
|          |                                                                                                                                                                            |                     |                       |    | All wildtype, isolated reared: 4 wpf, 8 wpf                                           | 0.166                  | $8.08 \times 10^{-1}$ | $9.05 \times 10^{-1}$ | ns      |       |
| Fig. S2b | Cumulative shoal distance, all 4 wpf, socially reared, <i>oxtr</i> <sup>+/+</sup> , <i>oxtr</i> <sup>-/-</sup> , <i>oxtrl</i> <sup>+/+</sup> , <i>oxtrl</i> <sup>-/-</sup> | 0.200               | $2.00 \times 10^{-4}$ | ** | All 4 wpf, socially reared: <i>oxtr</i> <sup>+/+</sup> , <i>oxtr</i> <sup>-/-</sup>   | 0.270                  | $5.34 \times 10^{-2}$ | $8.01 \times 10^{-2}$ | ns      |       |
|          |                                                                                                                                                                            |                     |                       |    | All 4 wpf, socially reared: <i>oxtrl</i> <sup>+/+</sup> , <i>oxtrl</i> <sup>-/-</sup> | 0.115                  | $4.52 \times 10^{-1}$ | $4.52 \times 10^{-1}$ | ns      |       |
|          |                                                                                                                                                                            |                     |                       |    | All 4 wpf, socially reared: <i>oxtr</i> <sup>+/+</sup> , <i>oxtrl</i> <sup>+/+</sup>  | 0.370                  | $1.79 \times 10^{-2}$ | $5.37 \times 10^{-2}$ | ns      |       |

|          |                                                                                                                                                                            | Kruskal-Wallis test |          |                         |       | Wilcoxon rank-sum test                                                                |       |                         |                         |       |
|----------|----------------------------------------------------------------------------------------------------------------------------------------------------------------------------|---------------------|----------|-------------------------|-------|---------------------------------------------------------------------------------------|-------|-------------------------|-------------------------|-------|
|          |                                                                                                                                                                            | groups              | $\eta^2$ | p                       | sign. | groups                                                                                | r     | p                       | corr. p                 | sign. |
| Fig. S2b | Cumulative shoal distance, all 8 wpf, socially reared, <i>oxtr</i> <sup>+/+</sup> , <i>oxtr</i> <sup>-/-</sup> , <i>oxtrl</i> <sup>+/+</sup> , <i>oxtrl</i> <sup>-/-</sup> |                     | 0.087    | 5.25 x 10 <sup>-2</sup> | ns    | All 8 wpf, socially reared: <i>oxtr</i> <sup>+/+</sup> , <i>oxtr</i> <sup>-/-</sup>   | 0.280 | 6.05 x 10 <sup>-2</sup> | 1.82 x 10 <sup>-1</sup> | ns    |
|          |                                                                                                                                                                            |                     |          |                         |       | All 8 wpf, socially reared: <i>oxtrl</i> <sup>+/+</sup> , <i>oxtrl</i> <sup>-/-</sup> | 0.012 | 9.37 x 10 <sup>-1</sup> | 9.37 x 10 <sup>-1</sup> | ns    |
|          |                                                                                                                                                                            |                     |          |                         |       | All 8 wpf, socially reared: <i>oxtr</i> <sup>+/+</sup> , <i>oxtrl</i> <sup>+/+</sup>  | 0.212 | 1.50 x 10 <sup>-1</sup> | 2.25 x 10 <sup>-1</sup> | ns    |
| Fig. S2c | Boldness, all 4 wpf, socially reared, <i>oxtr</i> <sup>+/+</sup> , <i>oxtr</i> <sup>-/-</sup> , <i>oxtrl</i> <sup>+/+</sup> , <i>oxtrl</i> <sup>-/-</sup>                  |                     | 0.170    | 1.20 x 10 <sup>-3</sup> | **    | All 4 wpf, socially reared: <i>oxtr</i> <sup>+/+</sup> , <i>oxtr</i> <sup>-/-</sup>   | 0.133 | 3.41 x 10 <sup>-1</sup> | 3.66 x 10 <sup>-1</sup> | ns    |
|          |                                                                                                                                                                            |                     |          |                         |       | All 4 wpf, socially reared: <i>oxtrl</i> <sup>+/+</sup> , <i>oxtrl</i> <sup>-/-</sup> | 0.138 | 3.66 x 10 <sup>-1</sup> | 3.66 x 10 <sup>-1</sup> | ns    |
|          |                                                                                                                                                                            |                     |          |                         |       | All 4 wpf, socially reared: <i>oxtr</i> <sup>+/+</sup> , <i>oxtrl</i> <sup>+/+</sup>  | 0.319 | 4.10 x 10 <sup>-2</sup> | 1.23 x 10 <sup>-1</sup> | ns    |
|          | Boldness, all 8 wpf, socially reared, <i>oxtr</i> <sup>+/+</sup> , <i>oxtr</i> <sup>-/-</sup> , <i>oxtrl</i> <sup>+/+</sup> , <i>oxtrl</i> <sup>-/-</sup>                  |                     | 0.295    | 8.54 x 10 <sup>-6</sup> | ***   | All 8 wpf, socially reared: <i>oxtr</i> <sup>+/+</sup> , <i>oxtr</i> <sup>-/-</sup>   | 0.185 | 2.15 x 10 <sup>-1</sup> | 2.71 x 10 <sup>-1</sup> | ns    |
|          |                                                                                                                                                                            |                     |          |                         |       | All 8 wpf, socially reared: <i>oxtrl</i> <sup>+/+</sup> , <i>oxtrl</i> <sup>-/-</sup> | 0.164 | 2.71 x 10 <sup>-1</sup> | 2.71 x 10 <sup>-1</sup> | ns    |
|          |                                                                                                                                                                            |                     |          |                         |       | All 8 wpf, socially reared: <i>oxtr</i> <sup>+/+</sup> , <i>oxtrl</i> <sup>+/+</sup>  | 0.413 | 5.10 x 10 <sup>-2</sup> | 1.53 x 10 <sup>-1</sup> | ns    |

|          |                                                                                                | Kruskal-Wallis test |          |                         |       | Wilcoxon rank-sum test                                                               |       |                         |                         |       |
|----------|------------------------------------------------------------------------------------------------|---------------------|----------|-------------------------|-------|--------------------------------------------------------------------------------------|-------|-------------------------|-------------------------|-------|
|          |                                                                                                | groups              | $\eta^2$ | p                       | sign. | groups                                                                               | r     | p                       | corr. p                 | sign. |
| Fig. S3a | All 2 wpf, socially reared: wildtype, <i>oxtr</i> <sup>-/-</sup> , <i>oxtrl</i> <sup>-/-</sup> |                     | 0.309    | 3.49 x 10 <sup>-4</sup> | ***   | All 2 wpf, socially reared: wildtype, <i>oxtr</i> <sup>-/-</sup>                     | 0.674 | 2.23 x 10 <sup>-4</sup> | 6.69 x 10 <sup>-4</sup> | ***   |
|          |                                                                                                |                     |          |                         |       | All 2 wpf, socially reared: wildtype, <i>oxtrl</i> <sup>-/-</sup>                    | 0.526 | 2.54 x 10 <sup>-3</sup> | 3.81 x 10 <sup>-3</sup> | **    |
|          |                                                                                                |                     |          |                         |       | All 2 wpf, socially reared: <i>oxtr</i> <sup>-/-</sup> , <i>oxtrl</i> <sup>-/-</sup> | 0.186 | 2.86 x 10 <sup>-1</sup> | 2.86 x 10 <sup>-1</sup> | ns    |
|          | All 3 wpf, socially reared: wildtype, <i>oxtr</i> <sup>-/-</sup> , <i>oxtrl</i> <sup>-/-</sup> |                     | 0.314    | 1.97 x 10 <sup>-4</sup> | ***   | All 3 wpf, socially reared: wildtype, <i>oxtr</i> <sup>-/-</sup>                     | 0.645 | 2.11 x 10 <sup>-4</sup> | 6.33 x 10 <sup>-4</sup> | ***   |
|          |                                                                                                |                     |          |                         |       | All 3 wpf, socially reared: wildtype, <i>oxtrl</i> <sup>-/-</sup>                    | 0.601 | 5.55 x 10 <sup>-4</sup> | 8.33 x 10 <sup>-4</sup> | ***   |
|          |                                                                                                |                     |          |                         |       | All 3 wpf, socially reared: <i>oxtr</i> <sup>-/-</sup> , <i>oxtrl</i> <sup>-/-</sup> | 0.066 | 6.92 x 10 <sup>-1</sup> | 6.92 x 10 <sup>-1</sup> | ns    |
|          | All 4 wpf, socially reared: wildtype, <i>oxtr</i> <sup>-/-</sup> , <i>oxtrl</i> <sup>-/-</sup> |                     | 0.218    | 4.71 x 10 <sup>-3</sup> | **    | All 4 wpf, socially reared: wildtype, <i>oxtr</i> <sup>-/-</sup>                     | 0.224 | 2.36 x 10 <sup>-1</sup> | 2.36 x 10 <sup>-1</sup> | ns    |
|          |                                                                                                |                     |          |                         |       | All 4 wpf, socially reared: wildtype, <i>oxtrl</i> <sup>-/-</sup>                    | 0.515 | 4.16 x 10 <sup>-3</sup> | 1.25 x 10 <sup>-2</sup> | *     |
|          |                                                                                                |                     |          |                         |       | All 4 wpf, socially reared: <i>oxtr</i> <sup>-/-</sup> , <i>oxtrl</i> <sup>-/-</sup> | 0.474 | 1.37 x 10 <sup>-2</sup> | 2.06 x 10 <sup>-2</sup> | *     |

|          |                                                                                                 | Kruskal-Wallis test |          |                         |       | Wilcoxon rank-sum test                                                                |       |                         |                         |       |
|----------|-------------------------------------------------------------------------------------------------|---------------------|----------|-------------------------|-------|---------------------------------------------------------------------------------------|-------|-------------------------|-------------------------|-------|
|          |                                                                                                 | groups              | $\eta^2$ | p                       | sign. | groups                                                                                | r     | p                       | corr. p                 | sign. |
| Fig. S3a | All 8 wpf, socially reared: wildtype, <i>oxtr</i> <sup>-/-</sup> , <i>oxtrl</i> <sup>-/-</sup>  |                     | 0.069    | 9.84 x 10 <sup>-2</sup> | ns    | All 8 wpf, socially reared: wildtype, <i>oxtr</i> <sup>-/-</sup>                      | 0.354 | 5.64 x 10 <sup>-2</sup> | 1.64 x 10 <sup>-1</sup> | ns    |
|          |                                                                                                 |                     |          |                         |       | All 8 wpf, socially reared: wildtype, <i>oxtrl</i> <sup>-/-</sup>                     | 0.083 | 6.85 x 10 <sup>-1</sup> | 6.85 x 10 <sup>-1</sup> | ns    |
|          |                                                                                                 |                     |          |                         |       | All 8 wpf, socially reared: <i>oxtr</i> <sup>-/-</sup> , <i>oxtrl</i> <sup>-/-</sup>  | 0.309 | 1.09 x 10 <sup>-1</sup> | 1.64 x 10 <sup>-1</sup> | ns    |
|          | All 2 wpf, isolation reared: wildtype, <i>oxtr</i> <sup>-/-</sup> , <i>oxtrl</i> <sup>-/-</sup> |                     | 0.464    | 3.48 x 10 <sup>-4</sup> | ***   | All 2 wpf, isolation reared: wildtype, <i>oxtr</i> <sup>-/-</sup>                     | 0.747 | 8.29 x 10 <sup>-4</sup> | 2.49 x 10 <sup>-3</sup> | **    |
|          |                                                                                                 |                     |          |                         |       | All 2 wpf, isolation reared: wildtype, <i>oxtrl</i> <sup>-/-</sup>                    | 0.627 | 2.14 x 10 <sup>-3</sup> | 3.21 x 10 <sup>-3</sup> | **    |
|          |                                                                                                 |                     |          |                         |       | All 2 wpf, isolation reared: <i>oxtr</i> <sup>-/-</sup> , <i>oxtrl</i> <sup>-/-</sup> | 0.379 | 8.25 x 10 <sup>-2</sup> | 8.25 x 10 <sup>-2</sup> | ns    |
|          | All 3 wpf, isolation reared: wildtype, <i>oxtr</i> <sup>-/-</sup> , <i>oxtrl</i> <sup>-/-</sup> |                     | 0.492    | 3.22 x 10 <sup>-5</sup> | ***   | All 3 wpf, isolation reared: wildtype, <i>oxtr</i> <sup>-/-</sup>                     | 0.789 | 2.16 x 10 <sup>-5</sup> | 6.48 x 10 <sup>-5</sup> | ***   |
|          |                                                                                                 |                     |          |                         |       | All 3 wpf, isolation reared: wildtype, <i>oxtrl</i> <sup>-/-</sup>                    | 0.379 | 6.94 x 10 <sup>-2</sup> | 6.94 x 10 <sup>-2</sup> | ns    |
|          |                                                                                                 |                     |          |                         |       | All 3 wpf, isolation reared: <i>oxtr</i> <sup>-/-</sup> , <i>oxtrl</i> <sup>-/-</sup> | 0.506 | 5.56 x 10 <sup>-3</sup> | 8.34 x 10 <sup>-3</sup> | **    |



|          |                                                                                                 | Kruskal-Wallis test |          |                         |       | Wilcoxon rank-sum test                                                                |       |                         |                         |       |
|----------|-------------------------------------------------------------------------------------------------|---------------------|----------|-------------------------|-------|---------------------------------------------------------------------------------------|-------|-------------------------|-------------------------|-------|
|          |                                                                                                 | groups              | $\eta^2$ | p                       | sign. | groups                                                                                | r     | p                       | corr. p                 | sign. |
| Fig. S3a | All 4 wpf, isolation reared: wildtype, <i>oxtr</i> <sup>-/-</sup> , <i>oxtrl</i> <sup>-/-</sup> |                     | 0.003    | 3.86 x 10 <sup>-1</sup> | ns    | All 4 wpf, isolation reared: wildtype, <i>oxtr</i> <sup>-/-</sup>                     | 0.085 | 7.04 x 10 <sup>-1</sup> | 7.04 x 10 <sup>-1</sup> | ns    |
|          |                                                                                                 |                     |          |                         |       | All 4 wpf, isolation reared: wildtype, <i>oxtrl</i> <sup>-/-</sup>                    | 0.185 | 3.85 x 10 <sup>-1</sup> | 5.78 x 10 <sup>-1</sup> | ns    |
|          |                                                                                                 |                     |          |                         |       | All 4 wpf, isolation reared: <i>oxtr</i> <sup>-/-</sup> , <i>oxtrl</i> <sup>-/-</sup> | 0.260 | 2.02 x 10 <sup>-1</sup> | 5.78 x 10 <sup>-1</sup> | ns    |
|          | All 8 wpf, isolation reared: wildtype, <i>oxtr</i> <sup>-/-</sup> , <i>oxtrl</i> <sup>-/-</sup> |                     | 0.015    | 2.70 x 10 <sup>-1</sup> | ns    | All 8 wpf, isolation reared: wildtype, <i>oxtr</i> <sup>-/-</sup>                     | 0.181 | 3.56 x 10 <sup>-1</sup> | 5.28 x 10 <sup>-1</sup> | ns    |
|          |                                                                                                 |                     |          |                         |       | All 8 wpf, isolation reared: wildtype, <i>oxtrl</i> <sup>-/-</sup>                    | 0.110 | 5.28 x 10 <sup>-1</sup> | 5.28 x 10 <sup>-1</sup> | ns    |
|          |                                                                                                 |                     |          |                         |       | All 8 wpf, isolation reared: <i>oxtr</i> <sup>-/-</sup> , <i>oxtrl</i> <sup>-/-</sup> | 0.314 | 1.03 x 10 <sup>-1</sup> | 3.09 x 10 <sup>-1</sup> | ns    |
| Fig. S3b | All 2 wpf, socially reared: wildtype, <i>oxtr</i> <sup>-/-</sup> , <i>oxtrl</i> <sup>-/-</sup>  |                     | 0.230    | 2.08 x 10 <sup>-3</sup> | **    | All 2 wpf, socially reared: wildtype, <i>oxtr</i> <sup>-/-</sup>                      | 0.682 | 1.89 x 10 <sup>-4</sup> | 5.67 x 10 <sup>-4</sup> | ***   |
|          |                                                                                                 |                     |          |                         |       | All 2 wpf, socially reared: wildtype, <i>oxtrl</i> <sup>-/-</sup>                     | 0.356 | 4.11 x 10 <sup>-2</sup> | 6.17 x 10 <sup>-2</sup> | ns    |
|          |                                                                                                 |                     |          |                         |       | All 2 wpf, socially reared: <i>oxtr</i> <sup>-/-</sup> , <i>oxtrl</i> <sup>-/-</sup>  | 0.167 | 3.38 x 10 <sup>-1</sup> | 3.38 x 10 <sup>-1</sup> | ns    |

|          |                                                                                                | Kruskal-Wallis test |          |                         |       | Wilcoxon rank-sum test                                                               |       |                         |                         |       |
|----------|------------------------------------------------------------------------------------------------|---------------------|----------|-------------------------|-------|--------------------------------------------------------------------------------------|-------|-------------------------|-------------------------|-------|
|          |                                                                                                | groups              | $\eta^2$ | p                       | sign. | groups                                                                               | r     | p                       | corr. p                 | sign. |
| Fig. S3b | All 3 wpf, socially reared: wildtype, <i>oxtr</i> <sup>-/-</sup> , <i>oxtrl</i> <sup>-/-</sup> |                     | 0.256    | 7.97 x 10 <sup>-4</sup> | ***   | All 3 wpf, socially reared: wildtype, <i>oxtr</i> <sup>-/-</sup>                     | 0.450 | 9.70 x 10 <sup>-3</sup> | 1.46 x 10 <sup>-2</sup> | *     |
|          |                                                                                                |                     |          |                         |       | All 3 wpf, socially reared: wildtype, <i>oxtrl</i> <sup>-/-</sup>                    | 0.645 | 2.11 x 10 <sup>-4</sup> | 6.33 x 10 <sup>-4</sup> | ***   |
|          |                                                                                                |                     |          |                         |       | All 3 wpf, socially reared: <i>oxtr</i> <sup>-/-</sup> , <i>oxtrl</i> <sup>-/-</sup> | 0.171 | 3.04 x 10 <sup>-1</sup> | 3.04 x 10 <sup>-1</sup> | ns    |
|          | All 4 wpf, socially reared: wildtype, <i>oxtr</i> <sup>-/-</sup> , <i>oxtrl</i> <sup>-/-</sup> |                     | 0.010    | 3.04 x 10 <sup>-1</sup> | ns    | All 4 wpf, socially reared: wildtype, <i>oxtr</i> <sup>-/-</sup>                     | 0.224 | 2.37 x 10 <sup>-1</sup> | 3.56 x 10 <sup>-1</sup> | ns    |
|          |                                                                                                |                     |          |                         |       | All 4 wpf, socially reared: wildtype, <i>oxtrl</i> <sup>-/-</sup>                    | 0.018 | 9.21 x 10 <sup>-1</sup> | 9.21 x 10 <sup>-1</sup> | ns    |
|          |                                                                                                |                     |          |                         |       | All 4 wpf, socially reared: <i>oxtr</i> <sup>-/-</sup> , <i>oxtrl</i> <sup>-/-</sup> | 0.286 | 1.37 x 10 <sup>-1</sup> | 3.56 x 10 <sup>-1</sup> | ns    |
|          | All 8 wpf, socially reared: wildtype, <i>oxtr</i> <sup>-/-</sup> , <i>oxtrl</i> <sup>-/-</sup> |                     | 0.032    | 6.61 x 10 <sup>-1</sup> | ns    | All 8 wpf, socially reared: wildtype, <i>oxtr</i> <sup>-/-</sup>                     | 0.110 | 5.54 x 10 <sup>-1</sup> | 7.86 x 10 <sup>-1</sup> | ns    |
|          |                                                                                                |                     |          |                         |       | All 8 wpf, socially reared: wildtype, <i>oxtrl</i> <sup>-/-</sup>                    | 0.177 | 3.85 x 10 <sup>-1</sup> | 7.86 x 10 <sup>-1</sup> | ns    |
|          |                                                                                                |                     |          |                         |       | All 8 wpf, socially reared: <i>oxtr</i> <sup>-/-</sup> , <i>oxtrl</i> <sup>-/-</sup> | 0.052 | 7.86 x 10 <sup>-1</sup> | 7.86 x 10 <sup>-1</sup> | ns    |

|          |                                                                                                 | Kruskal-Wallis test |          |                         |       | Wilcoxon rank-sum test                                                                |       |                         |                         |       |
|----------|-------------------------------------------------------------------------------------------------|---------------------|----------|-------------------------|-------|---------------------------------------------------------------------------------------|-------|-------------------------|-------------------------|-------|
|          |                                                                                                 | groups              | $\eta^2$ | p                       | sign. | groups                                                                                | r     | p                       | corr. p                 | sign. |
| Fig. S3b | All 2 wpf, isolation reared: wildtype, <i>oxtr</i> <sup>-/-</sup> , <i>oxtrl</i> <sup>-/-</sup> |                     | 0.581    | 6.03 x 10 <sup>-5</sup> | ***   | All 2 wpf, isolation reared: wildtype, <i>oxtr</i> <sup>-/-</sup>                     | 0.815 | 2.66 x 10 <sup>-4</sup> | 7.98 x 10 <sup>-4</sup> | ***   |
|          |                                                                                                 |                     |          |                         |       | All 2 wpf, isolation reared: wildtype, <i>oxtrl</i> <sup>-/-</sup>                    | 0.509 | 1.27 x 10 <sup>-2</sup> | 1.27 x 10 <sup>-2</sup> | *     |
|          |                                                                                                 |                     |          |                         |       | All 2 wpf, isolation reared: <i>oxtr</i> <sup>-/-</sup> , <i>oxtrl</i> <sup>-/-</sup> | 0.699 | 1.30 x 10 <sup>-3</sup> | 1.95 x 10 <sup>-3</sup> | **    |
|          | All 3 wpf, isolation reared: wildtype, <i>oxtr</i> <sup>-/-</sup> , <i>oxtrl</i> <sup>-/-</sup> |                     | 0.564    | 8.11 x 10 <sup>-6</sup> | ***   | All 3 wpf, isolation reared: wildtype, <i>oxtr</i> <sup>-/-</sup>                     | 0.755 | 4.75 x 10 <sup>-5</sup> | 1.43 x 10 <sup>-4</sup> | ***   |
|          |                                                                                                 |                     |          |                         |       | All 3 wpf, isolation reared: wildtype, <i>oxtrl</i> <sup>-/-</sup>                    | 0.558 | 7.40 x 10 <sup>-3</sup> | 7.40 x 10 <sup>-3</sup> | **    |
|          |                                                                                                 |                     |          |                         |       | All 3 wpf, isolation reared: <i>oxtr</i> <sup>-/-</sup> , <i>oxtrl</i> <sup>-/-</sup> | 0.607 | 8.90 x 10 <sup>-4</sup> | 1.34 x 10 <sup>-3</sup> | **    |
|          | All 4 wpf, isolation reared: wildtype, <i>oxtr</i> <sup>-/-</sup> , <i>oxtrl</i> <sup>-/-</sup> |                     | 0.075    | 1.19 x 10 <sup>-1</sup> | ns    | All 4 wpf, isolation reared: wildtype, <i>oxtr</i> <sup>-/-</sup>                     | 0.136 | 5.43 x 10 <sup>-1</sup> | 5.43 x 10 <sup>-1</sup> | ns    |
|          |                                                                                                 |                     |          |                         |       | All 4 wpf, isolation reared: wildtype, <i>oxtrl</i> <sup>-/-</sup>                    | 0.384 | 7.14 x 10 <sup>-2</sup> | 1.98 x 10 <sup>-1</sup> | ns    |
|          |                                                                                                 |                     |          |                         |       | All 4 wpf, isolation reared: <i>oxtr</i> <sup>-/-</sup> , <i>oxtrl</i> <sup>-/-</sup> | 0.307 | 1.32 x 10 <sup>-1</sup> | 1.98 x 10 <sup>-1</sup> | ns    |

|          |                                                                                                 | Kruskal-Wallis test |          |                         |       | Wilcoxon rank-sum test                                                                |       |                         |                         |       |
|----------|-------------------------------------------------------------------------------------------------|---------------------|----------|-------------------------|-------|---------------------------------------------------------------------------------------|-------|-------------------------|-------------------------|-------|
|          |                                                                                                 | groups              | $\eta^2$ | p                       | sign. | groups                                                                                | r     | p                       | corr. p                 | sign. |
| Fig. S3b | All 8 wpf, isolation reared: wildtype, <i>oxtr</i> <sup>-/-</sup> , <i>oxtrl</i> <sup>-/-</sup> |                     | 0.170    | 1.23 x 10 <sup>-2</sup> | *     | All 8 wpf, isolation reared: wildtype, <i>oxtr</i> <sup>-/-</sup>                     | 0.563 | 4.10 x 10 <sup>-3</sup> | 1.23 x 10 <sup>-2</sup> | *     |
|          |                                                                                                 |                     |          |                         |       | All 8 wpf, isolation reared: wildtype, <i>oxtrl</i> <sup>-/-</sup>                    | 0.097 | 5.77 x 10 <sup>-1</sup> | 5.77 x 10 <sup>-1</sup> | ns    |
|          |                                                                                                 |                     |          |                         |       | All 8 wpf, isolation reared: <i>oxtr</i> <sup>-/-</sup> , <i>oxtrl</i> <sup>-/-</sup> | 0.440 | 2.23 x 10 <sup>-2</sup> | 3.35 x 10 <sup>-2</sup> | *     |
| Fig. S3c | All 2 wpf, socially reared: wildtype, <i>oxtr</i> <sup>-/-</sup> , <i>oxtrl</i> <sup>-/-</sup>  |                     | 0.077    | 6.57 x 10 <sup>-2</sup> | ns    | All 2 wpf, socially reared: wildtype, <i>oxtr</i> <sup>-/-</sup>                      | 0.097 | 5.94 x 10 <sup>-1</sup> | 5.94 x 10 <sup>-1</sup> | ns    |
|          |                                                                                                 |                     |          |                         |       | All 2 wpf, socially reared: wildtype, <i>oxtrl</i> <sup>-/-</sup>                     | 0.288 | 9.82 x 10 <sup>-2</sup> | 2.95 x 10 <sup>-1</sup> | ns    |
|          |                                                                                                 |                     |          |                         |       | All 2 wpf, socially reared: <i>oxtr</i> <sup>-/-</sup> , <i>oxtrl</i> <sup>-/-</sup>  | 0.360 | 3.85 x 10 <sup>-1</sup> | 5.78 x 10 <sup>-1</sup> | ns    |
|          | All 3 wpf, socially reared: wildtype, <i>oxtr</i> <sup>-/-</sup> , <i>oxtrl</i> <sup>-/-</sup>  |                     | 0.014    | 2.71 x 10 <sup>-1</sup> | ns    | All 3 wpf, socially reared: wildtype, <i>oxtr</i> <sup>-/-</sup>                      | 0.067 | 7.01 x 10 <sup>-1</sup> | 7.01 x 10 <sup>-1</sup> | ns    |
|          |                                                                                                 |                     |          |                         |       | All 3 wpf, socially reared: wildtype, <i>oxtrl</i> <sup>-/-</sup>                     | 0.244 | 1.61 x 10 <sup>-1</sup> | 3.48 x 10 <sup>-1</sup> | ns    |
|          |                                                                                                 |                     |          |                         |       | All 3 wpf, socially reared: <i>oxtr</i> <sup>-/-</sup> , <i>oxtrl</i> <sup>-/-</sup>  | 0.199 | 2.32 x 10 <sup>-1</sup> | 3.48 x 10 <sup>-1</sup> | ns    |

|          |                                                                                                 | Kruskal-Wallis test |          |                         | Wilcoxon rank-sum test |                                                                                       |       |                         |                         |       |
|----------|-------------------------------------------------------------------------------------------------|---------------------|----------|-------------------------|------------------------|---------------------------------------------------------------------------------------|-------|-------------------------|-------------------------|-------|
|          |                                                                                                 | groups              | $\eta^2$ | p                       | sign.                  | groups                                                                                | r     | p                       | corr. p                 | sign. |
| Fig. S3c | All 4 wpf, socially reared: wildtype, <i>oxtr</i> <sup>-/-</sup> , <i>oxtrl</i> <sup>-/-</sup>  |                     | 0.089    | 6.25 x 10 <sup>-2</sup> | ns                     | All 4 wpf, socially reared: wildtype, <i>oxtr</i> <sup>-/-</sup>                      | 0.205 | 2.79 x 10 <sup>-1</sup> | 2.79 x 10 <sup>-1</sup> | ns    |
|          |                                                                                                 |                     |          |                         |                        | All 4 wpf, socially reared: wildtype, <i>oxtrl</i> <sup>-/-</sup>                     | 0.384 | 3.26 x 10 <sup>-2</sup> | 9.77 x 10 <sup>-2</sup> | ns    |
|          |                                                                                                 |                     |          |                         |                        | All 4 wpf, socially reared: <i>oxtr</i> <sup>-/-</sup> , <i>oxtrl</i> <sup>-/-</sup>  | 0.236 | 2.21 x 10 <sup>-1</sup> | 2.79 x 10 <sup>-1</sup> | ns    |
|          | All 8 wpf, socially reared: wildtype, <i>oxtr</i> <sup>-/-</sup> , <i>oxtrl</i> <sup>-/-</sup>  |                     | 0.012    | 2.91 x 10 <sup>-1</sup> | ns                     | All 8 wpf, socially reared: wildtype, <i>oxtr</i> <sup>-/-</sup>                      | 0.241 | 1.95 x 10 <sup>-1</sup> | 2.93 x 10 <sup>-1</sup> | ns    |
|          |                                                                                                 |                     |          |                         |                        | All 8 wpf, socially reared: wildtype, <i>oxtrl</i> <sup>-/-</sup>                     | 0.321 | 1.16 x 10 <sup>-1</sup> | 2.93 x 10 <sup>-1</sup> | ns    |
|          |                                                                                                 |                     |          |                         |                        | All 8 wpf, socially reared: <i>oxtr</i> <sup>-/-</sup> , <i>oxtrl</i> <sup>-/-</sup>  | 0.069 | 7.19 x 10 <sup>-1</sup> | 7.19 x 10 <sup>-1</sup> | ns    |
|          | All 2 wpf, isolation reared: wildtype, <i>oxtr</i> <sup>-/-</sup> , <i>oxtrl</i> <sup>-/-</sup> |                     | 0.006    | 4.05 x 10 <sup>-1</sup> | ns                     | All 2 wpf, isolation reared: wildtype, <i>oxtr</i> <sup>-/-</sup>                     | 0.303 | 1.76 x 10 <sup>-1</sup> | 5.28 x 10 <sup>-1</sup> | ns    |
|          |                                                                                                 |                     |          |                         |                        | All 2 wpf, isolation reared: wildtype, <i>oxtrl</i> <sup>-/-</sup>                    | 0.137 | 5.03 x 10 <sup>-1</sup> | 5.84 x 10 <sup>-1</sup> | ns    |
|          |                                                                                                 |                     |          |                         |                        | All 2 wpf, isolation reared: <i>oxtr</i> <sup>-/-</sup> , <i>oxtrl</i> <sup>-/-</sup> | 0.119 | 5.84 x 10 <sup>-1</sup> | 5.84 x 10 <sup>-1</sup> | ns    |

|          |                                                                                                 | Kruskal-Wallis test |          |                         | Wilcoxon rank-sum test |                                                                                       |       |                         |                         |       |
|----------|-------------------------------------------------------------------------------------------------|---------------------|----------|-------------------------|------------------------|---------------------------------------------------------------------------------------|-------|-------------------------|-------------------------|-------|
|          |                                                                                                 | groups              | $\eta^2$ | p                       | sign.                  | groups                                                                                | r     | p                       | corr. p                 | sign. |
| Fig. S3c | All 3 wpf, isolation reared: wildtype, <i>oxtr</i> <sup>-/-</sup> , <i>oxtrl</i> <sup>-/-</sup> |                     | 0.010    | 4.48 x 10 <sup>-1</sup> | ns                     | All 3 wpf, isolation reared: wildtype, <i>oxtr</i> <sup>-/-</sup>                     | 0.224 | 2.27 x 10 <sup>-1</sup> | 3.71 x 10 <sup>-1</sup> | ns    |
|          |                                                                                                 |                     |          |                         |                        | All 3 wpf, isolation reared: wildtype, <i>oxtrl</i> <sup>-/-</sup>                    | 0     | 1                       | 1                       | ns    |
|          |                                                                                                 |                     |          |                         |                        | All 3 wpf, isolation reared: <i>oxtr</i> <sup>-/-</sup> , <i>oxtrl</i> <sup>-/-</sup> | 0.211 | 2.47 x 10 <sup>-1</sup> | 3.71 x 10 <sup>-1</sup> | ns    |
|          | All 4 wpf, isolation reared: wildtype, <i>oxtr</i> <sup>-/-</sup> , <i>oxtrl</i> <sup>-/-</sup> |                     | 0.030    | 5.76 x 10 <sup>-1</sup> | ns                     | All 4 wpf, isolation reared: wildtype, <i>oxtr</i> <sup>-/-</sup>                     | 0.225 | 3.15 x 10 <sup>-1</sup> | 6.05 x 10 <sup>-1</sup> | ns    |
|          |                                                                                                 |                     |          |                         |                        | All 4 wpf, isolation reared: wildtype, <i>oxtrl</i> <sup>-/-</sup>                    | 0.029 | 8.94 x 10 <sup>-1</sup> | 8.94 x 10 <sup>-1</sup> | ns    |
|          |                                                                                                 |                     |          |                         |                        | All 4 wpf, isolation reared: <i>oxtr</i> <sup>-/-</sup> , <i>oxtrl</i> <sup>-/-</sup> | 0.171 | 4.03 x 10 <sup>-1</sup> | 6.05 x 10 <sup>-1</sup> | ns    |
|          | All 8 wpf, isolation reared: wildtype, <i>oxtr</i> <sup>-/-</sup> , <i>oxtrl</i> <sup>-/-</sup> |                     | NaN      | NaN                     | NaN                    | All 8 wpf, isolation reared: wildtype, <i>oxtr</i> <sup>-/-</sup>                     | NaN   | NaN                     | NaN                     | NaN   |
|          |                                                                                                 |                     |          |                         |                        | All 8 wpf, isolation reared: wildtype, <i>oxtrl</i> <sup>-/-</sup>                    | NaN   | NaN                     | NaN                     | NaN   |
|          |                                                                                                 |                     |          |                         |                        | All 8 wpf, isolation reared: <i>oxtr</i> <sup>-/-</sup> , <i>oxtrl</i> <sup>-/-</sup> | NaN   | NaN                     | NaN                     | NaN   |

|          |                                                                                                | Kruskal-Wallis test |                         |    |                                                                                      | Wilcoxon rank-sum test |                         |                         |         |       |
|----------|------------------------------------------------------------------------------------------------|---------------------|-------------------------|----|--------------------------------------------------------------------------------------|------------------------|-------------------------|-------------------------|---------|-------|
|          |                                                                                                | groups              | $\eta^2$                | p  | sign.                                                                                | groups                 | r                       | p                       | corr. p | sign. |
| Fig. S3d | All 2 wpf, socially reared: wildtype, <i>oxtr</i> <sup>-/-</sup> , <i>oxtrl</i> <sup>-/-</sup> | 0.086               | 5.36 x 10 <sup>-2</sup> | ns | All 2 wpf, socially reared: wildtype, <i>oxtr</i> <sup>-/-</sup>                     | 0                      | 1                       | 1                       | ns      |       |
|          |                                                                                                |                     |                         |    | All 2 wpf, socially reared: wildtype, <i>oxtrl</i> <sup>-/-</sup>                    | 0.349                  | 4.51 x 10 <sup>-2</sup> | 7.41 x 10 <sup>-2</sup> | ns      |       |
|          |                                                                                                |                     |                         |    | All 2 wpf, socially reared: <i>oxtr</i> <sup>-/-</sup> , <i>oxtrl</i> <sup>-/-</sup> | 0.342                  | 4.94 x 10 <sup>-2</sup> | 7.41 x 10 <sup>-2</sup> | ns      |       |
|          | All 3 wpf, socially reared: wildtype, <i>oxtr</i> <sup>-/-</sup> , <i>oxtrl</i> <sup>-/-</sup> | 0.011               | 4.79 x 10 <sup>-1</sup> | ns | All 3 wpf, socially reared: wildtype, <i>oxtr</i> <sup>-/-</sup>                     | 0.106                  | 5.43 x 10 <sup>-1</sup> | 6.48 x 10 <sup>-1</sup> | ns      |       |
|          |                                                                                                |                     |                         |    | All 3 wpf, socially reared: wildtype, <i>oxtrl</i> <sup>-/-</sup>                    | 0.080                  | 6.48 x 10 <sup>-1</sup> | 6.48 x 10 <sup>-1</sup> | ns      |       |
|          |                                                                                                |                     |                         |    | All 3 wpf, socially reared: <i>oxtr</i> <sup>-/-</sup> , <i>oxtrl</i> <sup>-/-</sup> | 0.202                  | 2.25 x 10 <sup>-1</sup> | 6.48 x 10 <sup>-1</sup> | ns      |       |
|          | All 4 wpf, socially reared: wildtype, <i>oxtr</i> <sup>-/-</sup> , <i>oxtrl</i> <sup>-/-</sup> | 0.033               | 1.90 x 10 <sup>-1</sup> | ns | All 4 wpf, socially reared: wildtype, <i>oxtr</i> <sup>-/-</sup>                     | 0.274                  | 1.47 x 10 <sup>-1</sup> | 2.51 x 10 <sup>-1</sup> | ns      |       |
|          |                                                                                                |                     |                         |    | All 4 wpf, socially reared: wildtype, <i>oxtrl</i> <sup>-/-</sup>                    | 0                      | 1                       | 1                       | ns      |       |
|          |                                                                                                |                     |                         |    | All 4 wpf, socially reared: <i>oxtr</i> <sup>-/-</sup> , <i>oxtrl</i> <sup>-/-</sup> | 0.266                  | 1.67 x 10 <sup>-1</sup> | 2.51 x 10 <sup>-1</sup> | ns      |       |

|          |                                                                                                 | Kruskal-Wallis test |                         |    |                                                                                       | Wilcoxon rank-sum test |                         |                         |         |       |
|----------|-------------------------------------------------------------------------------------------------|---------------------|-------------------------|----|---------------------------------------------------------------------------------------|------------------------|-------------------------|-------------------------|---------|-------|
|          |                                                                                                 | groups              | $\eta^2$                | p  | sign.                                                                                 | groups                 | r                       | p                       | corr. p | sign. |
| Fig. S3d | All 8 wpf, socially reared: wildtype, <i>oxtr</i> <sup>-/-</sup> , <i>oxtrl</i> <sup>-/-</sup>  | 0.010               | 3.05 x 10 <sup>-1</sup> | ns | All 8 wpf, socially reared: wildtype, <i>oxtr</i> <sup>-/-</sup>                      | 0.232                  | 2.12 x 10 <sup>-1</sup> | 3.18 x 10 <sup>-1</sup> | ns      |       |
|          |                                                                                                 |                     |                         |    | All 8 wpf, socially reared: wildtype, <i>oxtrl</i> <sup>-/-</sup>                     | 0.308                  | 1.31 x 10 <sup>-1</sup> | 3.18 x 10 <sup>-1</sup> | ns      |       |
|          |                                                                                                 |                     |                         |    | All 8 wpf, socially reared: <i>oxtr</i> <sup>-/-</sup> , <i>oxtrl</i> <sup>-/-</sup>  | 0.084                  | 6.61 x 10 <sup>-1</sup> | 6.61 x 10 <sup>-1</sup> | ns      |       |
|          | All 2 wpf, isolation reared: wildtype, <i>oxtr</i> <sup>-/-</sup> , <i>oxtrl</i> <sup>-/-</sup> | 0.120               | 6.11 x 10 <sup>-2</sup> | ns | All 2 wpf, isolation reared: wildtype, <i>oxtr</i> <sup>-/-</sup>                     | 0.303                  | 1.76 x 10 <sup>-1</sup> | 2.22 x 10 <sup>-1</sup> | ns      |       |
|          |                                                                                                 |                     |                         |    | All 2 wpf, isolation reared: wildtype, <i>oxtrl</i> <sup>-/-</sup>                    | 0.249                  | 2.22 x 10 <sup>-1</sup> | 2.22 x 10 <sup>-1</sup> | ns      |       |
|          |                                                                                                 |                     |                         |    | All 2 wpf, isolation reared: <i>oxtr</i> <sup>-/-</sup> , <i>oxtrl</i> <sup>-/-</sup> | 0.478                  | 2.86 x 10 <sup>-2</sup> | 8.58 x 10 <sup>-2</sup> | ns      |       |
|          | All 3 wpf, isolation reared: wildtype, <i>oxtr</i> <sup>-/-</sup> , <i>oxtrl</i> <sup>-/-</sup> | 0.174               | 1.36 x 10 <sup>-2</sup> | *  | All 3 wpf, isolation reared: wildtype, <i>oxtr</i> <sup>-/-</sup>                     | 0.418                  | 2.43 x 10 <sup>-2</sup> | 4.86 x 10 <sup>-2</sup> | *       |       |
|          |                                                                                                 |                     |                         |    | All 3 wpf, isolation reared: wildtype, <i>oxtrl</i> <sup>-/-</sup>                    | 0.384                  | 6.59 x 10 <sup>-2</sup> | 6.59 x 10 <sup>-2</sup> | ns      |       |
|          |                                                                                                 |                     |                         |    | All 3 wpf, isolation reared: <i>oxtr</i> <sup>-/-</sup> , <i>oxtrl</i> <sup>-/-</sup> | NaN                    | NaN                     | NaN                     | NaN     |       |



|          |                                                                                                 | Kruskal-Wallis test |          |                         | Wilcoxon rank-sum test |                                                                                       |       |                         |                         |       |
|----------|-------------------------------------------------------------------------------------------------|---------------------|----------|-------------------------|------------------------|---------------------------------------------------------------------------------------|-------|-------------------------|-------------------------|-------|
|          |                                                                                                 | groups              | $\eta^2$ | p                       | sign.                  | groups                                                                                | r     | p                       | corr. p                 | sign. |
| Fig. S3d | All 4 wpf, isolation reared: wildtype, <i>oxtr</i> <sup>-/-</sup> , <i>oxtrl</i> <sup>-/-</sup> |                     | 0.159    | 3.41 x 10 <sup>-2</sup> | *                      | All 4 wpf, isolation reared: wildtype, <i>oxtr</i> <sup>-/-</sup>                     | NaN   | NaN                     | NaN                     | NaN   |
|          |                                                                                                 |                     |          |                         |                        | All 4 wpf, isolation reared: wildtype, <i>oxtrl</i> <sup>-/-</sup>                    | 0.370 | 8.25 x 10 <sup>-2</sup> | 8.25 x 10 <sup>-2</sup> | ns    |
|          |                                                                                                 |                     |          |                         |                        | All 4 wpf, isolation reared: <i>oxtr</i> <sup>-/-</sup> , <i>oxtrl</i> <sup>-/-</sup> | 0.392 | 5.11 x 10 <sup>-2</sup> | 8.25 x 10 <sup>-2</sup> | ns    |
|          | All 8 wpf, isolation reared: wildtype, <i>oxtr</i> <sup>-/-</sup> , <i>oxtrl</i> <sup>-/-</sup> |                     | NaN      | NaN                     | NaN                    | All 8 wpf, isolation reared: wildtype, <i>oxtr</i> <sup>-/-</sup>                     | NaN   | NaN                     | NaN                     | NaN   |
|          |                                                                                                 |                     |          |                         |                        | All 8 wpf, isolation reared: wildtype, <i>oxtrl</i> <sup>-/-</sup>                    | NaN   | NaN                     | NaN                     | NaN   |
|          |                                                                                                 |                     |          |                         |                        | All 8 wpf, isolation reared: <i>oxtr</i> <sup>-/-</sup> , <i>oxtrl</i> <sup>-/-</sup> | NaN   | NaN                     | NaN                     | NaN   |
